# Supplementary material for: Electrospun one-dimensional nanostructures: a new horizon for gas sensing materials
Source: PubMed Central journal article supplement (PMC6122236; doi:10.3762/bjnano.9.202), 2018-08-13
Supplement: Beilstein_J_Nanotechnol-09-2128-s001.pdf [file Beilstein_J_Nanotechnol-09-2128-s001.pdf]

# Supporting Information

for

## **Electrospun one-dimensional nanostructures: a new horizon for gas sensing materials**

Muhammad Imran<sup>1</sup>, Nunzio Motta<sup>1</sup>, and Mahnaz Shafiei<sup>1,2,\*</sup>

Address: <sup>1</sup>Institute for Future Environments and School of Chemistry, Physics, and Mechanical Engineering, Queensland University of Technology (QUT), Brisbane, QLD 4001, Australia and <sup>2</sup>Faculty of Science, Engineering and Technology, Swinburne University of Technology, Hawthorn, VIC 3122, Australia

Email: Mahnaz Shafiei - mshafiei@swin.edu.au

\*Corresponding author

## **Summary of electrospun materials and their gas sensing performance**

**Table S1:** Different types of electrospun material based gas sensors.

| Electrospinning parameters |                                |                   |                                                                 |                                 |           |                      |                       |                                      | Sensing Performance                                        |            |            |                            |                               |                 |                        |                                  |      |
|----------------------------|--------------------------------|-------------------|-----------------------------------------------------------------|---------------------------------|-----------|----------------------|-----------------------|--------------------------------------|------------------------------------------------------------|------------|------------|----------------------------|-------------------------------|-----------------|------------------------|----------------------------------|------|
| Sensing Platform           | Polymer                        | Solvent           | Precursor                                                       | Needle Type                     | Flow Rate | Applied Voltage (KV) | Working Distance (cm) | Post-treatment                       | Material                                                   | Morphology | Diameter   | Response                   | Optimum Operating Temperature | Detection Range | Response/Recovery Time | Analyte Gas                      | Ref. |
| Conductometric             | PVP                            | DMF               | In(NO <sub>3</sub> ) <sub>3</sub> ·xH <sub>2</sub> O            | 21-gauge needle                 | 0.05 ml/h | 20                   | 22                    | 600 °C for 2 h                       | CuO-In <sub>2</sub> O <sub>3</sub> nanocomposite           | NFs        | 40 nm      | 1.16×10 <sup>5</sup> /5ppm | 150 °C                        | 5 ppm           | - /140s                | H <sub>2</sub> S                 | [1]  |
| Conductometric             | PVP                            | DMF:ethanol (1:1) | In(NO <sub>3</sub> ) <sub>3</sub> ·4.5H <sub>2</sub> O          | hypodermic syringe              | 1.0 ml/h  | 20                   | 25                    | 600 °C for 1 h                       | In <sub>2</sub> O <sub>3</sub> -SnO <sub>2</sub> composite | NFs        | 40-100 nm  | 8.1/1ppm                   | 80 °C                         | 1-8.1 ppm       | 1s/6s                  | Trimethylamine                   | [2]  |
| Conductometric             | PVP                            | Ethanol, DMF      | WCl <sub>6</sub>                                                | 23SP                            | 1 μl/min  | 14                   | 10                    | 300 – 500 °C for 1 h                 | WO <sub>3</sub>                                            | NFs        | 20-100 nm  | 12.4/400 ppb               | 75 °C                         | 400 ppb         | 30s/32s                | NO <sub>2</sub>                  | [3]  |
| Conductometric             | Poly(styrene-co-acrylonitrile) | DMSO              | zinc acetate                                                    | hypodermic syringe ID = 0.5 mm  | 1.0 ml/h  | 20                   | 17                    | At 500 °C, 700 °C and 900 °C for 2 h | ZnO                                                        | NFs        | 60 nm      | 6/40 ppm                   | 160 °C and 200 °C             | 40 ppm          | --                     | NH <sub>3</sub>                  | [4]  |
| Conductometric             | PVP                            | DMF:ethanol (1:1) | P-type La <sub>0.7</sub> Sr <sub>0.3</sub> FeO <sub>3</sub> NPs | hypodermic syringe              | 1.0 ml/h  | 10                   | 20                    | 600 °C for 5 h in air                | L <sub>4</sub> SnO <sub>2</sub>                            | NFs        | 20 nm      | 28/1 ppm                   | 300 °C                        | 1 ppm           | 9s/15s                 | C <sub>2</sub> H <sub>5</sub> OH | [5]  |
| Conductometric             | PVAc                           | DMF               | Tin (IV) acetate                                                | stainless steel needle 25 gauge | 5 μl/min  | 16.5                 | 15                    | 500 °C for 2 h in air                | SnO <sub>2</sub>                                           | NFs        | 210±35 nm  | 57/2.5 ppm                 | 300 °C                        | 125 ppb-2.5 ppm | --                     | NO <sub>2</sub>                  | [6]  |
|                            |                                |                   |                                                                 |                                 |           |                      |                       |                                      |                                                            |            |            | 6.4/2.5 ppm                | 150 °C                        |                 |                        | H <sub>2</sub>                   |      |
| Conductometric             | PVP                            | Ethanol, DMF      | Co(NO <sub>3</sub> ) <sub>2</sub> ·6H <sub>2</sub> O and rGO    | N7-gauge needle                 | 0.2 ml/h  | 18.5                 | 13.5                  | 800 °C for 30 min                    | rGO-Co <sub>3</sub> O <sub>4</sub> composite               | NFs        | 200-300 nm | 53.6%/50 ppm               | 20 °C                         | 5 -100 ppm      | 4s/5 min               | NH <sub>3</sub>                  | [7]  |
| Conductometric             | PVA                            | DI water          | In(CH <sub>3</sub> COO) <sub>3</sub>                            | --                              | --        | 20                   | 15                    | 400 °C                               | In <sub>2</sub> O <sub>3</sub>                             | NFs        | 150-       | ~540%/10                   | 300 °C                        | 100             | --                     | CO                               | [8]  |

| Electrospinning parameters |            |                   |                                                                                            |                                         |           |                      |                       |                                                       | Sensing Performance                             |                                           |            |                                         |                               |                 |                        |                        |      |
|----------------------------|------------|-------------------|--------------------------------------------------------------------------------------------|-----------------------------------------|-----------|----------------------|-----------------------|-------------------------------------------------------|-------------------------------------------------|-------------------------------------------|------------|-----------------------------------------|-------------------------------|-----------------|------------------------|------------------------|------|
| Sensing Platform           | Polymer    | Solvent           | Precursor                                                                                  | Needle Type                             | Flow Rate | Applied Voltage (KV) | Working Distance (cm) | Post-treatment                                        | Material                                        | Morphology                                | Diameter   | Response                                | Optimum Operating Temperature | Detection Range | Response/Recovery Time | Analyte Gas            | Ref. |
| etric                      |            |                   |                                                                                            |                                         |           |                      |                       | , 500 °C or 600 °C in air for 3 h                     |                                                 |                                           | 200 nm     | 0 ppm                                   |                               | ppm             |                        |                        |      |
| Conductometric             | PVP        | Ethanol:DMF (1:3) | Indium nitrate (In(NO <sub>3</sub> ) <sub>3</sub> ·xH <sub>2</sub> O),                     | stainless steel needle 21 G             | 1.5 ml/h  | 15                   | 15                    | 600 °C for 3 h in air                                 | In <sub>2</sub> O <sub>3</sub>                  | NRbs                                      | 20-300 nm  | ~68.5/12p pm                            | 200 °C                        | 1 - 17 ppm      | 43min/93 min           | NO <sub>2</sub>        | [9]  |
| Conductometric             | PVAc       | DMF               | Titanium (IV) propoxide                                                                    | steel orifice (inner diameter of 450 μm | 1.5 ml/h  | 1.5                  | 10                    | three step 280 °C , 350 °C , and 420 °C each step 1 h | TiO <sub>2</sub>                                | Porous nanostructured layer (nano-grains) | 29-42 nm   | ~2/2 ppm CO ~3.25/2 ppm NO <sub>2</sub> | 450 °C                        | 0.25 - 2 ppm    | Several min            | CO and NO <sub>2</sub> | [10] |
| Conductometric             | PVP        | DMF:ethanol (1:1) | In(NO <sub>3</sub> ) <sub>3</sub> .4.5H <sub>2</sub> O                                     | --                                      | --        | 20                   | 25                    | 600 °C for 4 h in air                                 | In <sub>2</sub> xNi <sub>x</sub> O <sub>3</sub> | NFs                                       | 62 nm      | 7.2/500 ppb 107.7/10 ppm                | 70 °C and 130 °C              | 0.5 - 20 ppm    | 580s/650s              | NO <sub>2</sub>        | [11] |
| Conductometric             | PVP        | DMF:ethanol (1:1) | In(NO <sub>3</sub> ) <sub>3</sub> and Mg(NO <sub>3</sub> ) <sub>2</sub> ·6H <sub>2</sub> O | 23 G                                    | --        | 15                   | 15                    | 600°C for 2 h in air                                  | Mg-In <sub>2</sub> O <sub>3</sub>               | NTs                                       | 80 nm      | 173.7/10 ppm                            | 150 °C                        | 0.5 - 10 ppm    | --                     | H <sub>2</sub> S       | [12] |
| Conductometric             | PANI /PMMA | THF               | --                                                                                         | --                                      | --        | 7                    | 6                     | -                                                     | PAN/PMMA Composite                              | NFs                                       | 2.5-3.5 μm | 1.38/1 ppm                              | RT                            | 1-30 ppm        | 10s/-                  | NH <sub>3</sub>        | [13] |
| Conductometric             | PVP, PAN   | DMF               | SnCl <sub>2</sub> ·2H <sub>2</sub> O                                                       | --                                      | 0.4 ml/h  | 20                   | 15                    | 500 °C for 4 h in air                                 | SnO <sub>2</sub>                                | NFs                                       | 80-400 nm  | 2.4/1 ppm                               | 150 °C                        | 0.06%           | 21s/33s                | H <sub>2</sub>         | [14] |
| Conductometric             | PVA        | DI water          | SnCl <sub>4</sub> ·5H <sub>2</sub> O                                                       | --                                      | --        | 10                   | 10                    | 300, 500                                              | SnO <sub>2</sub>                                | NFs                                       | 100 nm     | 4.5/10 ppm                              | 330 °C                        | 10 ppm          | 13s/13.9s              | ethanol                | [15] |

| Electrospinning parameters |         |                         |                                                                                                                    |             |               |                      |                       |                       | Sensing Performance                                             |            |              |               |                               |                    |                        |                  |      |
|----------------------------|---------|-------------------------|--------------------------------------------------------------------------------------------------------------------|-------------|---------------|----------------------|-----------------------|-----------------------|-----------------------------------------------------------------|------------|--------------|---------------|-------------------------------|--------------------|------------------------|------------------|------|
| Sensing Platform           | Polymer | Solvent                 | Precursor                                                                                                          | Needle Type | Flow Rate     | Applied Voltage (KV) | Working Distance (cm) | Post-treatment        | Material                                                        | Morphology | Diameter     | Response      | Optimum Operating Temperature | Detection Range    | Response/Recovery Time | Analyte Gas      | Ref. |
|                            |         |                         |                                                                                                                    |             |               |                      |                       | and 700 °C for 4 h    |                                                                 |            |              |               |                               |                    |                        |                  |      |
| Conductometric             | PVP     | DMF:ethanol (1:1)       | Zn(NO <sub>3</sub> ) <sub>2</sub> · 6H <sub>2</sub> O and SnCl <sub>2</sub> · 2H <sub>2</sub> O                    | --          | --            | --                   | --                    | 600 °C for 5 h        | ZnO – SnO <sub>2</sub>                                          | HFns       | 150 nm       | 83/20 ppm     | 260 °C                        | 200 ppm            | 4–7s/4–5s              | ethanol          | [16] |
| Conductometric             | PVP     | DMF                     | In(NO <sub>3</sub> ) <sub>3</sub> · 4 ½ H <sub>2</sub> O and Ce(NO <sub>3</sub> ) <sub>3</sub> · 6H <sub>2</sub> O | --          | --            | 16                   | --                    | 600 °C for 3 h        | In <sub>2</sub> O <sub>3</sub> – CeO <sub>2</sub>               | NTs        | OD 90–180 nm | 498/20 ppm    | 80 °C                         | 20 ppm             | 64s/204s               | H <sub>2</sub> S | [17] |
| Conductometric             | PVP     | DMF                     | In(NO <sub>3</sub> ) <sub>3</sub> · 4 ½ H <sub>2</sub> O and Al <sub>2</sub> (NO <sub>3</sub> ) <sub>3</sub>       | ID = 0.8 mm | 0.25 ml/h     | 15                   | --                    | 550 °C for 4 h in air | Al <sub>2</sub> O <sub>3</sub> – In <sub>2</sub> O <sub>3</sub> | NTs        | 200 nm       | 0.47/291 ppb  | RT                            | 291 ppb–97 ppm     | 24s/--                 | NO <sub>x</sub>  | [18] |
| Conductometric             | PVP     | DMF:ethanol (1:1)       | In(NO <sub>3</sub> ) <sub>3</sub> and SnCl <sub>2</sub>                                                            | ID = 0.8 mm | 0.004 ml/m in | 15                   | --                    | 550 °C for 4 h in air | In <sub>2</sub> O <sub>3</sub> – SnO <sub>2</sub>               | NRs        | 230 nm       | 8.98/100 ppm  | RT                            | 0.1–100 ppm        | 4.67s /--              | NO <sub>x</sub>  | [19] |
| Conductometric             | PVP     | acetic acid and ethanol | C <sub>16</sub> H <sub>36</sub> O <sub>4</sub> Ti and In(NO <sub>3</sub> ) <sub>3</sub> · 4.5H <sub>2</sub> O      | 0.8 mm      | --            | 14                   | --                    | 600 °C for 4 h in air | In <sub>2</sub> O <sub>3</sub> /Ti O <sub>2</sub>               | NFs        | 200 nm       | 41.1%/97 ppm  | RT                            | 97 ppb – 97 ppm    | 3s/--                  | NO <sub>x</sub>  | [20] |
| Conductometric             | PVP     | DMF:ethanol (1:1)       | In(NO <sub>3</sub> ) <sub>3</sub>                                                                                  | --          | --            | 15                   | --                    | 500 °C for 2 h        | In <sub>2</sub> O <sub>3</sub>                                  | NTs        | --           | 23.46/100 ppm | 280 °C                        | 100 ppm            | 1s/57s                 | acetone          | [21] |
|                            |         |                         |                                                                                                                    |             |               |                      |                       |                       |                                                                 | NWs        |              |               |                               |                    |                        |                  |      |
| Conductometric             | PVP     | DMF and ethanol         | Fe(NO <sub>3</sub> ) <sub>3</sub> · 9H <sub>2</sub> O and Al(NO <sub>3</sub> ) <sub>3</sub> · 9H <sub>2</sub> O    | --          | --            | 13                   | --                    | 550 °C for 4 h        | Al-doped α-Fe <sub>2</sub> O <sub>3</sub>                       | NTs        | OD 90        | 41.8/50 ppm   | 240 °C                        | 300 ppb – 500 ppm  | 20s/60s                | ethanol          | [22] |
| Conductometric             | PVP     | DMF:ethanol (1:1)       | SnCl <sub>2</sub> · 2H <sub>2</sub> O and AlCl <sub>3</sub> · 6H <sub>2</sub> O                                    | --          | --            | 10                   | 15                    | 600 °C for 2 h        | Al-doped SnO <sub>2</sub>                                       | NTs        | OD 200       | 7.82/1000 ppb | 240 °C                        | 1000 ppb – 100 ppb | --                     | formaldehyde     | [23] |

| Electrospinning parameters |         |                        |                                                                                                                                                                           |             |             |                      |                       |                       | Sensing Performance                     |            |                  |                                                      |                               |                   |                        |                               |      |
|----------------------------|---------|------------------------|---------------------------------------------------------------------------------------------------------------------------------------------------------------------------|-------------|-------------|----------------------|-----------------------|-----------------------|-----------------------------------------|------------|------------------|------------------------------------------------------|-------------------------------|-------------------|------------------------|-------------------------------|------|
| Sensing Platform           | Polymer | Solvent                | Precursor                                                                                                                                                                 | Needle Type | Flow Rate   | Applied Voltage (KV) | Working Distance (cm) | Post-treatment        | Material                                | Morphology | Diameter         | Response                                             | Optimum Operating Temperature | Detection Range   | Response/Recovery Time | Analyte Gas                   | Ref. |
| Conductometric             | PVP     | DMF:ethanol (1:1)      | In(NO <sub>3</sub> ) <sub>3</sub> ·4.5H <sub>2</sub> O and H <sub>2</sub> PtCl <sub>6</sub>                                                                               | ID = 0.8 mm | --          | 15                   | 20                    | 700 °C for 4 h        | Pt doped In <sub>2</sub> O <sub>3</sub> | NFs        | 160–200 nm       | 1490/600 ppm                                         | 200 °C                        | 50 ppm – 600 ppm  | 60s / 120s             | H <sub>2</sub> S              | [24] |
| Conductometric             | PVP     | DMF                    | In(NO <sub>3</sub> ) <sub>3</sub> ·4.5H <sub>2</sub> O and HAuCl <sub>4</sub>                                                                                             | --          | --          | 22                   | 20                    | 550 °C                | Au doped In <sub>2</sub> O <sub>3</sub> | NFs        | 80 – 100 nm      | 13.8/500 ppm                                         | 140 °C                        | 10 ppm – 4000 ppm | 12s/24s                | ethanol                       | [25] |
| Conductometric             | PVA     | DI water               | zinc acetate and Ni(NO <sub>3</sub> ) <sub>2</sub>                                                                                                                        | --          | --          | 8                    | 20                    | 650 °C for 3 h in air | Ni doped ZnO                            | NFs        | 100 nm           | 16.9/2000 ppm                                        | 250 °C                        | 2000 ppm          | 5s/10s                 | C <sub>2</sub> H <sub>2</sub> | [26] |
| Conductometric             | PMMA    | DMF, DI water, PDADMAC | (NH <sub>4</sub> ) <sub>6</sub> H <sub>2</sub> W <sub>12</sub> O <sub>40</sub> ·xH <sub>2</sub> O<br>K <sub>2</sub> PtCl <sub>4</sub><br>K <sub>2</sub> PdCl <sub>4</sub> | 25G         | 0.2 ml/m in | 15                   | 15                    | 500 °C for 1 h in air | WO <sub>3</sub>                         | NTs        | 1.57 μm – 3.37 μ | 63.59/ 5 ppm toward NO<br>1.05/ 5 ppm toward toluene | 350 °C                        | 50 ppb - 5ppm     | --                     | NO, Toluene                   | [27] |
|                            |         |                        |                                                                                                                                                                           |             |             |                      |                       |                       | Pt – WO <sub>3</sub>                    |            |                  | 4.22/ 5 ppm toward NO<br>2.74/5 ppm toward toluene   |                               |                   |                        |                               |      |

| Electrospinning parameters |         |                                   |                                                                                                                                        |                         |                  |                      |                       |                       | Sensing Performance                   |                               |              |                                                   |                               |                  |                        |                |      |
|----------------------------|---------|-----------------------------------|----------------------------------------------------------------------------------------------------------------------------------------|-------------------------|------------------|----------------------|-----------------------|-----------------------|---------------------------------------|-------------------------------|--------------|---------------------------------------------------|-------------------------------|------------------|------------------------|----------------|------|
| Sensing Platform           | Polymer | Solvent                           | Precursor                                                                                                                              | Needle Type             | Flow Rate        | Applied Voltage (KV) | Working Distance (cm) | Post-treatment        | Material                              | Morphology                    | Diameter     | Response                                          | Optimum Operating Temperature | Detection Range  | Response/Recovery Time | Analyte Gas    | Ref. |
|                            |         |                                   |                                                                                                                                        |                         |                  |                      |                       |                       | Pd – WO <sub>3</sub>                  |                               |              | 3.89/5 ppm toward NO<br>2.60/5 ppm toward toluene |                               |                  |                        |                |      |
| Conductometric             | PVP     | DMF and ethanol                   | C <sub>16</sub> H <sub>36</sub> O <sub>4</sub> Ti                                                                                      | --                      | --               | 16                   | --                    | 650 °C for 4 h in air | TiO <sub>2</sub>                      | NRs                           | 500 nm       | 20/1000 ppm                                       | 500 °C                        | 50 - 500 ppm     | 11-14s/4-8s            | acetone        | [28] |
| Conductometric             | PVP     | DMF, Ethanol                      | Zn(AC) <sub>2</sub> ·2H <sub>2</sub> O And Pr(NO <sub>3</sub> ) <sub>3</sub> ·6H <sub>2</sub> O                                        | --                      | --               | 17                   | 20                    | 600 °C for 3 h in air | Pr-doped ZnO                          | NFs                           | 180 – 270 nm | 3.71/100 ppm                                      | 380 °C                        | 20 ppm – 800 ppm | 51s/40s                | acetic acid    | [29] |
| Conductometric             | PVP     | DMF:ethanol (1:1)                 | SnCl <sub>2</sub> ·2H <sub>2</sub> O and ZnCl <sub>2</sub>                                                                             | ID = 0.8 mm             | 20 μl/min        | 10                   | 20                    | 600 °C for 5 h in air | ZnO–SnO <sub>2</sub>                  | NFs                           | 100 – 200 nm | 18 / 100 ppm                                      | 300 °C                        | 1 - 10000        | 5s/6s                  | ethanol        | [30] |
| Conductometric             | PMMA    | DMF                               | SWCNTs                                                                                                                                 | --                      | 0.1 – 1.5 ml/h   | 10 – 30              | --                    | --                    | PMMA/CNTs                             | NFs                           | 200–500 nm   | 1.3/2083 ppm                                      | RT                            | 1 – 3471 ppm     | --                     | methanol       | [31] |
| Conductometric             | PVP     | glacial acetic ethanol, and water | Zn(AC) <sub>2</sub> ·2H <sub>2</sub> O, hexamethylenetetramine and Tetrabutyl titanate                                                 | --                      | --               | 20                   | --                    | 500 °C for 2 h in air | TiO <sub>2</sub> /ZnO                 | (NSs on NFs) heterostructures | 70 – 100 nm  | 15.7/100 ppm                                      | 280 °C                        | 10 – 200 ppm     | 5s/3s                  | ethanol        | [32] |
| Conductometric             | PVP     | DMF:ethanol (1:1)                 | Zn(AC) <sub>2</sub> ·2H <sub>2</sub> O and PdCl <sub>2</sub>                                                                           | 0.25 mm                 | 0.05 ml/h        | 18                   | 20                    | 600 °C for 3 h in air | Pd-doped ZnO                          | NFs                           | 70 – 160 nm  | 5.5/20 ppm                                        | 220 °C                        | 1 – 20 ppm       | 25-29s/12-17s          | CO             | [33] |
| Conductometric             | PVP     | DI Water                          | (NH <sub>4</sub> ) <sub>6</sub> H <sub>2</sub> W <sub>12</sub> O <sub>40</sub> ·xH <sub>2</sub> O and K <sub>2</sub> PdCl <sub>4</sub> | ID = 0.8 mm<br>OD = 1.6 | 0.01 ml/for core | 30                   | 15                    | 600 °C for 1 h in air | Pd functionalized WO <sub>3</sub> NTs | NTs                           | --           | 17.6/500 ppm                                      | 450 °C                        | 10 – 500 ppm     | 25s/ -                 | H <sub>2</sub> |      |

| Electrospinning parameters |               |                                                      |                                                                                            |                          |                              |                      |                       |                                        |                                | Sensing Performance |              |                   |                               |                    |                        |                          |      |                   |
|----------------------------|---------------|------------------------------------------------------|--------------------------------------------------------------------------------------------|--------------------------|------------------------------|----------------------|-----------------------|----------------------------------------|--------------------------------|---------------------|--------------|-------------------|-------------------------------|--------------------|------------------------|--------------------------|------|-------------------|
| Sensing Platform           | Polymer       | Solvent                                              | Precursor                                                                                  | Needle Type              | Flow Rate                    | Applied Voltage (KV) | Working Distance (cm) | Post-treatment                         | Material                       | Morphology          | Diameter     | Response          | Optimum Operating Temperature | Detection Range    | Response/Recovery Time | Analyte Gas              | Ref. |                   |
|                            |               |                                                      |                                                                                            | mm+                      | and 0.03 – 0.1 ml/h for core |                      |                       |                                        |                                |                     |              |                   |                               |                    |                        |                          |      |                   |
| Conductometric             | PVP           | DMF:ethanol (1:1)                                    | In(NO <sub>3</sub> ) <sub>3</sub> and Co(NO <sub>3</sub> ) <sub>2</sub> ·6H <sub>2</sub> O | --                       | --                           | 15                   | 20                    | 500 °C for 2 h in air                  | Co-In oxide                    | NFs                 | 50 – 90 nm   | 41.5/100 ppm      | 260 °C                        | 1 – 100 ppm        | 3s/25 s                | ethanol                  | [35] |                   |
|                            |               |                                                      |                                                                                            |                          |                              |                      |                       |                                        |                                | NTs                 | 150 – 200 nm | 93.1/100 ppm      |                               |                    |                        |                          |      | 3s/72 s           |
| Conductometric             | PVA           | DI water                                             | Zn(AC) <sub>2</sub>                                                                        | 0.51 mm                  | 0.5 ml/h                     | 10                   | 20                    | 700 °C for 2 h in air                  | ZnO                            | NFs                 | 150 – 200 nm | 15/5 ppm          | 300 °C                        | 1 ppm – 5 ppm      | --                     | CO                       | [36] |                   |
| Conductometric             | PMMA, PS, PPy | DMF                                                  | BPO                                                                                        | --                       | 6 ml/h                       | 8 – 9                | 10                    | --                                     | PPy/PMMA                       | NFs                 | 450 nm       | 14%/150 ppm       | --                            | 150 ppm            | 300s/-                 | NH <sub>3</sub>          | [37] |                   |
| Conductometric             | PCL           | HCSA, HFIP                                           | PANI                                                                                       | --                       | 0.3 ml/h                     | 5.8                  | 55                    |                                        | PANI-PCL                       | NFs                 | 150 nm       | 2.88%/ppm         | --                            | 1 – 75% saturation | --                     | H <sub>2</sub> O vapours | [38] |                   |
|                            |               |                                                      |                                                                                            |                          |                              |                      |                       |                                        |                                |                     |              | 40.0%/ppm         |                               |                    |                        |                          |      | 0.5 ppm – 100 ppm |
|                            |               |                                                      |                                                                                            |                          |                              |                      |                       |                                        |                                |                     |              | 251%/ppm          |                               |                    |                        |                          |      | 0.1 ppm – 10 ppm  |
| Conductometric             | PVP           | Water, ethanol                                       | In(NO <sub>3</sub> ) <sub>3</sub> ·4.5H <sub>2</sub> O                                     | ID = 0.45mm, OD = 0.5 mm | --                           | 20                   | 20                    | 500 °C for 1 h and then 700 °C for 2 h | In <sub>2</sub> O <sub>3</sub> | NFs                 | 50 – 150 nm  | ~3.7/30 ppm (V/v) | 220 °C                        | 1 ppm – 30 ppm     | 6s/10 s                | ethanol                  | [39] |                   |
| Conductometric             | PVP           | DMF:C <sub>2</sub> H <sub>5</sub> OH:CH <sub>3</sub> | In(NO <sub>3</sub> ) <sub>3</sub> ·4.5H <sub>2</sub> O                                     | --                       | 0.4                          | 15                   | 15                    | 600 °C                                 | In <sub>2</sub> O <sub>3</sub> | NTs                 | 100          | 11.9/50           | 240 °C                        | 1 ppm              | 10s/1                  | HCHO                     | [40] |                   |

| Electrospinning parameters |         |                   |                                                                                  |             |                                               |                      |                       |                                     | Sensing Performance                              |                    |                 |                                                               |                               |                  |                                                     |                                                                             |      |
|----------------------------|---------|-------------------|----------------------------------------------------------------------------------|-------------|-----------------------------------------------|----------------------|-----------------------|-------------------------------------|--------------------------------------------------|--------------------|-----------------|---------------------------------------------------------------|-------------------------------|------------------|-----------------------------------------------------|-----------------------------------------------------------------------------|------|
| Sensing Platform           | Polymer | Solvent           | Precursor                                                                        | Needle Type | Flow Rate                                     | Applied Voltage (KV) | Working Distance (cm) | Post-treatment                      | Material                                         | Morphology         | Diameter        | Response                                                      | Optimum Operating Temperature | Detection Range  | Response/Recovery Time                              | Analyte Gas                                                                 | Ref. |
| etric                      |         | COOH              |                                                                                  |             | ml/h for inner core – 0.6 ml/h for outer core |                      |                       | for 3 h in air                      |                                                  |                    | nm – 1100 nm    | ppm                                                           |                               | – 800 ppm        | 5s                                                  |                                                                             |      |
| Conductometric             | PVP     | DMF, ethanol      | ZnNO <sub>3</sub> and chromium nitrate                                           | --          | --                                            | 12                   | 15                    | 600 °C for 5 h in air               | Cr <sub>2</sub> O <sub>3</sub> -sensitized ZnO   | NFs                | 80 nm – 130 nm  | 24/100 ppm                                                    | 300 °C                        | 1 ppm – 200 ppm  | 1s/5s                                               | ethanol                                                                     | [41] |
| Conductometric             | PVAc    | DMF, ethanol      | CuCl <sub>2</sub> · 2H <sub>2</sub> O and SnCl <sub>2</sub> · 2H <sub>2</sub> O  | 21G         | 0.03 ml/h                                     | 15                   | 20                    | 700 °C for 1h in air                | CuO/SnO <sub>2</sub>                             | Mixed NFs          | 110 nm          | 522/10 ppm                                                    | 300 °C                        | 10 ppm – 100 ppm | 1s/30s                                              | H <sub>2</sub> S                                                            | [42] |
| Conductometric             | PVP     | DMF:ethanol (1:1) | Co(NO <sub>3</sub> ) <sub>2</sub> · 6H <sub>2</sub> O                            | 21G         | 0.5 ml/h                                      | 20                   | 15                    | 500, 600, and 700 °C for 2 h in air | Co <sub>3</sub> O <sub>4</sub>                   | NFs                | 100 nm – 200 nm | 51.2/100 ppm                                                  | 301 °C                        | 5 ppm – 100 ppm  | 22.7s/2.4s                                          | ethanol                                                                     | [43] |
| Conductometric             | PVP     | DMF:ethanol (1:1) | SnCl <sub>2</sub> · 2H <sub>2</sub> O and PdCl <sub>2</sub>                      | --          | --                                            | 20                   | 10                    | 600 °C for 2 h in air               | Pd-doped SnO <sub>2</sub>                        | HNFs               | 200 nm – 300 nm | 24.6/100 ppm<br>11.3/100 ppm<br>8.5/500 ppm<br>1020.6/100 ppm | 385 °C and 440 °C             | 1 – 500 ppm      | 0.4s/11.4s<br>15.1s/4.7s<br>0.8s/12.3s<br>1.0s/9.6s | H <sub>2</sub><br>CO<br>CH <sub>4</sub><br>C <sub>2</sub> H <sub>5</sub> OH | [44] |
| Conductometric             | PVP     | DMF and ethanol   | In(NO <sub>3</sub> ) <sub>3</sub> · 4.5H <sub>2</sub> O and tetra-butyl titanate | --          | 0.25 ml/h                                     | 16                   | --                    | 550 °C for 4 h in air               | TiO <sub>2</sub> -In <sub>2</sub> O <sub>3</sub> | Hemimicellated NFs | 150 nm – 250 nm | 95/97 ppm                                                     | RT                            | 0.3 ppm – 97 ppm | 4.3s/-                                              | NO <sub>2</sub>                                                             | [45] |



| Electrospinning parameters |         |                                                       |                                                         |             |           |                      |                       |                           | Sensing Performance |             |                 |                                |                               |                     |                        |                                 |      |
|----------------------------|---------|-------------------------------------------------------|---------------------------------------------------------|-------------|-----------|----------------------|-----------------------|---------------------------|---------------------|-------------|-----------------|--------------------------------|-------------------------------|---------------------|------------------------|---------------------------------|------|
| Sensing Platform           | Polymer | Solvent                                               | Precursor                                               | Needle Type | Flow Rate | Applied Voltage (KV) | Working Distance (cm) | Post-treatment            | Material            | Morphology  | Diameter        | Response                       | Optimum Operating Temperature | Detection Range     | Response/Recovery Time | Analyte Gas                     | Ref. |
| Conductometric             | PEO     | DI water, CSA and methanol                            | PANI and $Zn(CH_3COO)_2$                                | --          | 0.4 ml/h  | 18                   | 18                    | --                        | PANI/ZnO            | NFs         | 200 nm – 300 nm | 133.6/1000 ppm                 | 36 °C                         | 1000 ppm            | 150s/185s              | LPG                             | [46] |
| Conductometric             | PVP     | DMF                                                   | $Zn(AC)_2 \cdot H_2O$                                   | --          | --        | 20                   | 20                    | 600 °C for 3 h in air     | ZnO                 | NFs         | 150 – 200 nm    | 51/100 ppm                     | 270 °C                        | 10 – 2000 ppm       | 7–9s/9 – 11s           | ethanol                         | [47] |
| Conductometric             | PVP     | DMF:ethanol (1:1)                                     | $Zn(NO_3)_2 \cdot 6H_2O$ and $In(NO_3)_3 \cdot 4.5H_2O$ | --          | 0.4 ml/h  | 15                   | 15                    | 500 °C for 2 h in air     | IZO                 | NTs         | 60 – 80 nm      | 81.8/100 ppm                   | 275 °C                        | 5 – 5000 ppm        | 2 – 6s/56 – 63s        | ethanol                         | [48] |
| Conductometric             | PVP     | DMF:ethanol (1:1), ammonium persulfate (APS), and HCl | $In(NO_3)_3 \cdot 4.5H_2O$ and polyaniline              | 0.5 mm      | 0.5 ml/h  | 16                   | 16                    | 800 °C for 3 h in air     | $In_2O_3/PANI$      | NFs<br>HNFs | 850 nm          | 11.4/1000 ppm<br>52.4/1000 ppm | RT                            | 100 ppm – 1000 ppm  | --                     | $NH_3$                          | [49] |
| Conductometric             | PVP     | DMF and ethanol                                       | $Zn(CH_3COO)_2 \cdot H_2O$ and $Mn(CH_3COO)_2$          | --          | --        | 15                   | 25                    | 580 °C for 150 min in air | Mn-doped ZnO        | NFs         | 60 nm – 90 nm   | 203.9/450 ppm                  | 340 °C                        | 50 ppm – 1000 ppm   | 6s/4s                  | acetone                         | [50] |
| Conductometric             | PVP     | DMF:ethanol (1:1)                                     | $SnCl_2 \cdot 2H_2O$ , $LaCl_3$                         | --          | 1 ml/h    | 20                   | --                    | 600 °C for 2 h in air     | LaOCl-doped $SnO_2$ | NFs         | 180 nm          | 3.7/1000 ppm                   | 300 °C                        | 100 ppm – 20000 ppm | 24s/92s                | $CO_2$                          | [51] |
| Conductometric             | PVP     | DMF and ethanol                                       | $Zn(NO_3)_2$                                            | 0.7 mm      | --        | 22                   | --                    | 500 °C for 3 h in air     | ZnO                 | HNFs        | 60 nm           | 4.7/100 ppb<br>3.0/120 ppb     | 170 °C                        | 10 ppb – 30 ppm     | 10s/--<br>100s/--      | Nitrotoluene<br>Di-Nitrotoluene | [52] |

| Electrospinning parameters |         |                            |                                                                                               |             |           |                      |                       |                       | Sensing Performance                                      |            |                |                                                                                   |                               |                     |                                      |                                                       |      |
|----------------------------|---------|----------------------------|-----------------------------------------------------------------------------------------------|-------------|-----------|----------------------|-----------------------|-----------------------|----------------------------------------------------------|------------|----------------|-----------------------------------------------------------------------------------|-------------------------------|---------------------|--------------------------------------|-------------------------------------------------------|------|
| Sensing Platform           | Polymer | Solvent                    | Precursor                                                                                     | Needle Type | Flow Rate | Applied Voltage (KV) | Working Distance (cm) | Post-treatment        | Material                                                 | Morphology | Diameter       | Response                                                                          | Optimum Operating Temperature | Detection Range     | Response/Recovery Time               | Analyte Gas                                           | Ref. |
|                            |         |                            |                                                                                               |             |           |                      |                       |                       |                                                          |            |                |                                                                                   |                               |                     |                                      |                                                       |      |
|                            |         |                            |                                                                                               |             |           |                      |                       |                       |                                                          |            |                |                                                                                   |                               |                     | 1s/--                                | Nitromethane                                          |      |
|                            |         |                            |                                                                                               |             |           |                      |                       |                       |                                                          |            |                | 29/30 ppm                                                                         |                               |                     | 1s/--                                | Nitroethane                                           |      |
|                            |         |                            |                                                                                               |             |           |                      |                       |                       |                                                          |            |                | 83/30 ppm                                                                         |                               |                     |                                      |                                                       |      |
| Conductometric             | PVP     | DMF:ethanol (1:1)          | SnCl <sub>2</sub> ·2H <sub>2</sub> O and Al(NO <sub>3</sub> ) <sub>3</sub> ·9H <sub>2</sub> O | 1 mm        | --        | 15                   | 20                    | 600 °C for 5 h in air | Al-doped SnO <sub>2</sub>                                | NFs        | 80 nm – 120 nm | 7.7/100 ppm                                                                       | 340 °C                        | 10 ppm – 30,000 ppm | 3s/2s                                | H <sub>2</sub>                                        | [53] |
| Conductometric             | PVP     | DMF:ethanol (1:1)          | SnCl <sub>2</sub> ·2H <sub>2</sub> O and Fe(NO <sub>3</sub> ) <sub>3</sub> ·9H <sub>2</sub> O | --          | 0.4 ml/h  | 15                   | 15                    | 500 °C for 2 h in air | SnO <sub>2</sub> -doped α-Fe <sub>2</sub> O <sub>3</sub> | NTs        | 65 nm          | 27.45/100 ppm<br>10.07/100 ppm                                                    | 200 °C                        | 5 ppm – 10,000 ppm  | 3s/14 s<br>4s/12 s                   | ethanol<br>acetone                                    | [54] |
| Conductometric             | PEO     | HCSA and CHCl <sub>3</sub> | PANI                                                                                          | --          | --        | 8                    | --                    | --                    | HCSA-doped PANI                                          | NFs        | 20–150 nm      | 94/--<br>94/--<br>97/--                                                           | RT                            | --                  | 32s/20s<br>20s/20s<br>110s/50s       | methanol<br>ethanol<br>2-propanol                     | [55] |
| Conductometric             | PEO     | --                         | PEDOT:PSSA                                                                                    | --          | --        | 10                   | 20                    | --                    | PEDOT-PSSA                                               | NFs        | 5 nm – 50 nm   | 40%/12800 ppm<br>40%/60000 ppm<br>30%/13000 ppm<br>20%/23000 ppm<br>30%/15000 ppm | RT                            | --                  | 8s/--<br>10s/--<br>20s/--<br>240s/-- | methanol<br>ethanol<br>2-propanol<br>H <sub>2</sub> O | [56] |

| Electrospinning parameters |         |                              |                                                                                                                  |              |           |                      |                       |                                        | Sensing Performance                                                      |            |                 |                               |                               |                  |                                |                                           |      |
|----------------------------|---------|------------------------------|------------------------------------------------------------------------------------------------------------------|--------------|-----------|----------------------|-----------------------|----------------------------------------|--------------------------------------------------------------------------|------------|-----------------|-------------------------------|-------------------------------|------------------|--------------------------------|-------------------------------------------|------|
| Sensing Platform           | Polymer | Solvent                      | Precursor                                                                                                        | Needle Type  | Flow Rate | Applied Voltage (KV) | Working Distance (cm) | Post-treatment                         | Material                                                                 | Morphology | Diameter        | Response                      | Optimum Operating Temperature | Detection Range  | Response/Recovery Time         | Analyte Gas                               | Ref. |
|                            |         |                              |                                                                                                                  |              |           |                      |                       |                                        |                                                                          |            |                 | 20%/24700 ppm<br>30%/1000 ppm |                               |                  | 13s/--<br>95s/--<br>120s/--    | NH <sub>3</sub><br>HCl<br>NO <sub>2</sub> |      |
| Conductometric             | PVP     | DMF                          | In(NO <sub>3</sub> ) <sub>3</sub> ·4.5H <sub>2</sub> O                                                           | --           | --        | 16                   | 15                    | 600 °C for 2 h in air                  | In <sub>2</sub> O <sub>3</sub>                                           | NTs<br>NWs | 80 nm<br>120 nm | 166.6/20 ppm<br>141/20 ppm    | RT                            | 1-100 ppm        | 287s/<br>636s<br>199s/<br>317s | H <sub>2</sub> S                          | [57] |
| Conductometric             | PVP     | DMF and ethanol              | In(NO <sub>3</sub> ) <sub>3</sub> and Fe(NO <sub>3</sub> ) <sub>3</sub>                                          | --           | --        | 15                   | 20                    | 550 °C for 2 h                         | Fe <sub>2</sub> O <sub>3</sub> -In <sub>2</sub> O <sub>3</sub> composite | NTs        | 200 nm          | 33/100 ppm                    | 240 °C                        | 1-100 ppm        | 5s/<br>25s                     | formaldehyde                              | [58] |
| Conductometric             | PVP     | DMF                          | Zn(CH <sub>3</sub> COO) <sub>2</sub> ·2H <sub>2</sub> O and In(NO <sub>3</sub> ) <sub>3</sub> ·xH <sub>2</sub> O | 25 G         | 0.01 ml/h | 17                   | 15                    | 600 °C for 2 h in air                  | ZnO-In <sub>2</sub> O <sub>3</sub> composite                             | NFs        | --              | 119.4/5 ppm                   | 375 °C                        | 0.05 - 5 ppm     | 1-2s/<br>1603s                 | trimethylamine                            | [59] |
| Conductometric             | PVP     | DMF                          | SnCl <sub>2</sub> ·2H <sub>2</sub> O and In(NO <sub>3</sub> ) <sub>3</sub> ·4.5H <sub>2</sub> O                  | --           | 0.1 ml/h  | 15                   | 15                    | 350 °C for 1 h - 600 °C for 3 h in air | SnO <sub>2</sub> /In <sub>2</sub> O <sub>3</sub>                         | NTs        | 80 - 120 nm     | 400/500 ppm                   | 300 °C                        | 250 ppb-500 ppm  | 60s/<br>97s                    | formaldehyde                              | [60] |
| Conductometric             | PVP     | DMF and ethanol              | SnCl <sub>2</sub> ·2H <sub>2</sub> O and In(NO <sub>3</sub> ) <sub>3</sub> ·41/2H <sub>2</sub> O                 | --           | --        | --                   | 5                     | 600 °C for 2 h in air                  | SnO <sub>2</sub> /In <sub>2</sub> O <sub>3</sub> composite               | NFs        | 200 - 250 nm    | 35.69/50 ppm                  | 290 °C                        | 0.5 ppm - 50 ppm | 20s/<br>40s                    | formaldehyde                              | [61] |
| Conductometric             | PVP     | ethanol and glacial acetic   | tetrabutyl titanate and Zn(Ac) <sub>2</sub> ·2H <sub>2</sub> O                                                   | --           | --        | 20                   | --                    | 500 °C for 2 h in air                  | ZnO-TiO <sub>2</sub>                                                     | NFs        | 100 - 300 nm    | 50.6 /500 ppm                 | 320 °C                        | 20-500 ppm       | 50.6s/<br>5 - 10s              | ethanol                                   | [62] |
| Conductometric             | PVP     | DMF, ethanol and Acetic Acid | tungsten chloride and                                                                                            | ID = 1.01 mm | 0.5 ml/h  | 20                   | 15                    | 500 °C for 2 h                         | In <sub>2</sub> O <sub>3</sub> - WO <sub>3</sub>                         | NFs        | 170 nm          | 12.9/50 ppm                   | 275 °C                        | 0.4 ppm -        | 6s/<br>64s                     | acetone                                   | [63] |

| Electrospinning parameters |          |                                     |                                                                                |                    |           |                      |                       |                       | Sensing Performance                              |                       |               |                                     |                               |                             |                        |                                    |      |
|----------------------------|----------|-------------------------------------|--------------------------------------------------------------------------------|--------------------|-----------|----------------------|-----------------------|-----------------------|--------------------------------------------------|-----------------------|---------------|-------------------------------------|-------------------------------|-----------------------------|------------------------|------------------------------------|------|
| Sensing Platform           | Polymer  | Solvent                             | Precursor                                                                      | Needle Type        | Flow Rate | Applied Voltage (KV) | Working Distance (cm) | Post-treatment        | Material                                         | Morphology            | Diameter      | Response                            | Optimum Operating Temperature | Detection Range             | Response/Recovery Time | Analyte Gas                        | Ref. |
|                            |          |                                     | In(NO <sub>3</sub> ) <sub>3</sub> ·4.5H <sub>2</sub> O                         |                    |           |                      |                       | in air                |                                                  |                       |               |                                     |                               | 50 ppm                      |                        |                                    |      |
| Conductometric             | PVP      | DMF:ethanol (1:1)                   | In(NO <sub>3</sub> ) <sub>3</sub> ·4.5H <sub>2</sub> O and Sn(OH) <sub>4</sub> | --                 | 1.0 ml/h  | 20                   | 25                    | 500 °C for 2 h in air | SnO <sub>2</sub> /In <sub>2</sub> O <sub>3</sub> | NFs                   | 30 – 80 nm    | 21/1 ppm                            | RT                            | 0.1 ppm-1 ppm               | 7s/10 s                | NH <sub>3</sub>                    | [64] |
| Conductometric             | --       | DMF                                 | PMMA and PANI                                                                  | hyperdermic needle | 0.2 ml/h  | 20                   | 15                    | --                    | PANI/P MMA composite                             | NFs                   | 400 - 600 nm  | 77/500 ppm                          | RT                            | 20-500 ppm                  | 131s/600s              | Triethyleamine                     | [65] |
| Conductometric             | PANI/PA6 | Formic acid                         | TiO <sub>2</sub> (sputtered)                                                   | --                 | --        | --                   | --                    | --                    | TiO <sub>2</sub> -PANI/PA6                       | NFs                   | --            | 18.3/250 ppm                        | RT                            | 50 ppm – 250 ppm            | --                     | NH <sub>3</sub>                    | [66] |
| Conductometric             | PVP      | Acetylacetone, DI water and ethanol | titanium(IV) butoxide                                                          | --                 | --        | 20                   | 15                    | 600 °C for 3 h        | PANI/TiO <sub>2</sub> composite                  | NFs                   | 72-90 nm      | --                                  | RT                            | 25 - 200 ppb                | --                     | NH <sub>3</sub>                    | [67] |
| Conductometric             | PVP      | acetic acid and ethanol             | EDOT Ti(OiPr) <sub>4</sub>                                                     | 23 G               | 0.3 ml/h  | 7                    | 5                     | 500 °C for 3 h        | TiO <sub>2</sub> -PEDOT                          | Core-sheath nanocable | Core = ~78 nm | 0.86%/300 ppb<br>0.222%/10 ppm      | RT                            | 7-300 ppb<br>675 ppb-10 ppm | --                     | NO <sub>2</sub><br>NH <sub>3</sub> | [68] |
| Conductometric             | PVB      | DMF and ethanol                     | SnCl <sub>2</sub> ·2H <sub>2</sub> O                                           | ID = 0.7 mm        | 0.2 ml/h  | 8                    | 15                    | --                    | SnO <sub>2</sub> /PPy                            | NFs                   | 100-200 nm    | ~6.2%/ppm<br>In range of 1-10.7 ppm | RT                            | ~257 ppb-10.7 ppm           | 259s/468 s             | NH <sub>3</sub>                    | [69] |
| Conductometric             | PAN      | DMF                                 | SnCl <sub>2</sub> ·2H <sub>2</sub> O                                           | --                 | --        | 15                   | 20                    | 800 °C                | SnO <sub>2</sub> -carbon                         | NFs                   | 150 - 500 nm  | ~16.3/100 ppm                       | 200 °C                        | 100-35,000 ppm              | 4s/16s                 | H <sub>2</sub>                     | [70] |
| Conductometric             | PAN      | DMF                                 | SnCl <sub>4</sub> ·5H <sub>2</sub> O                                           | ID = 0.5 mm        | 0.4 ml/h  | 10                   | 20                    | 270 °C for 2 h        | Sn-SnO <sub>2</sub> /car                         | NFs                   | 350-400       | 46.15/1000 ppm                      | 240 °C                        | 10-2000                     | --                     | ethanol                            | [71] |

| Electrospinning parameters |         |                       |                                                                                                               |              |           |                      |                       |                                     | Sensing Performance                                                                            |            |              |                                                                         |                               |                             |                        |                                                                                                                                  |      |
|----------------------------|---------|-----------------------|---------------------------------------------------------------------------------------------------------------|--------------|-----------|----------------------|-----------------------|-------------------------------------|------------------------------------------------------------------------------------------------|------------|--------------|-------------------------------------------------------------------------|-------------------------------|-----------------------------|------------------------|----------------------------------------------------------------------------------------------------------------------------------|------|
| Sensing Platform           | Polymer | Solvent               | Precursor                                                                                                     | Needle Type  | Flow Rate | Applied Voltage (KV) | Working Distance (cm) | Post-treatment                      | Material                                                                                       | Morphology | Diameter     | Response                                                                | Optimum Operating Temperature | Detection Range             | Response/Recovery Time | Analyte Gas                                                                                                                      | Ref. |
|                            |         |                       |                                                                                                               |              |           |                      |                       | in air, and 800 °C for 30 min in Ar | bon                                                                                            |            | nm           |                                                                         |                               | ppm                         |                        |                                                                                                                                  |      |
| Conductometric             | PVA     | DI Water              | (CH <sub>3</sub> CO <sub>2</sub> ) <sub>2</sub> Zn and rGO                                                    | 21 G         | 0.03 ml/h | 15                   | 20                    | 500 °C for 5 h in air               | rGO-ZnO                                                                                        | NFs        | 150 nm       | 119/5 ppm                                                               | 400 °C                        | 1 ppm                       | 143s/259s              | NO <sub>2</sub>                                                                                                                  | [72] |
| Conductometric             | PVAc    | DMF and ethanol       | SnCl <sub>2</sub> ·2H <sub>2</sub> O graphene                                                                 | --           | --        | --                   | --                    | 600 °C for 30 min in air            | rGO-SnO <sub>2</sub>                                                                           | NFs        | 200 - 300 nm | 3.13/1 ppm                                                              | 300 °C                        | 1 ppm                       | 51.2 s/330 s           | C <sub>7</sub> H <sub>8</sub>                                                                                                    | [73] |
| Conductometric             | PVAc    | DMF and ethanol       | SnCl <sub>2</sub> ·2H <sub>2</sub> O GO PdCl <sub>2</sub> H <sub>2</sub> PtCl <sub>6</sub> ·nH <sub>2</sub> O | ID = 0.51 mm | 0.03 ml/h | 15                   | 20                    | 600 °C for 30 min in air            | SnO <sub>2</sub><br>rGO-SnO <sub>2</sub><br>rGO-Pd-SnO <sub>2</sub><br>rGO-Pt-SnO <sub>2</sub> | NFs        | --           | 1.6/1 ppm<br>3.3/1 ppm<br>8.3/1 ppm<br>255.5%/1 ppm                     | 200 °C                        | 1 ppm-5 ppm                 | --                     | C <sub>6</sub> H <sub>6</sub><br>C <sub>6</sub> H <sub>6</sub><br>C <sub>6</sub> H <sub>6</sub><br>C <sub>7</sub> H <sub>8</sub> | [74] |
| Conductometric             | PVP     | DMF and ethanol (2:1) | SnCl <sub>2</sub> ·2H <sub>2</sub> O rGO                                                                      | --           | --        | --                   | --                    | 450 °C for 2 h in air               | rGO/SnO <sub>2</sub>                                                                           | NFs        | --           | 32.2/10 ppm                                                             | 150 °C                        | --                          | 6 min/30 min           | NO <sub>2</sub>                                                                                                                  | [75] |
| SAW                        | PEO     | DI Water and ethanol  | polyethylene glycol (PEG)                                                                                     | --           | --        | 27                   | 25                    | --                                  | PEO                                                                                            | NFs        | 100 - 300 nm | -4 Hz/MHz /30%<br>-20 Hz/MHz /30%<br>-32 Hz/MHz /30%<br>-30 Hz/MHz /30% | RT                            | 10% - 90% saturated vapours | 60 - 120 s/60 s        | Isopropanol<br>nitrobenzene<br>toluene<br>hydrogen peroxide                                                                      | [76] |

| Electrospinning parameters |         |                 |                  |             |           |                      |                       |                | Sensing Performance   |            |            |                                        |                               |                 |                        |             |      |
|----------------------------|---------|-----------------|------------------|-------------|-----------|----------------------|-----------------------|----------------|-----------------------|------------|------------|----------------------------------------|-------------------------------|-----------------|------------------------|-------------|------|
| Sensing Platform           | Polymer | Solvent         | Precursor        | Needle Type | Flow Rate | Applied Voltage (KV) | Working Distance (cm) | Post-treatment | Material              | Morphology | Diameter   | Response                               | Optimum Operating Temperature | Detection Range | Response/Recovery Time | Analyte Gas | Ref. |
| SAW                        | --      | DMF             | PVB              | --          | 0.5 ml/h  | 6                    | 15                    | --             | PVB                   | NFs        | --         | 0.425 MHz/90% RH                       | RT                            | 10 %-90% RH     | --                     | Humidity    | [77] |
|                            |         | Chloroform      | PEO              | --          | 0.5 ml/h  | 4                    | 15                    |                | PEO                   |            |            | 3.428 MHz/90% RH                       |                               |                 |                        |             |      |
|                            |         | Ethanol         | PVP              | --          | 0.5 ml/h  | 6                    | 15                    |                | PVP                   |            |            | 8.134 MHz/90% RH                       |                               |                 |                        |             |      |
|                            |         | DMF             | PMMA             | --          | 1 ml/h    | 6                    | 12                    |                | PMMA                  |            |            | 0.312 MHz/90% RH                       |                               |                 |                        |             |      |
|                            |         | DMF             | PVDF             | --          | 1 ml/h    | 6                    | 12                    |                | PVDF                  |            |            | 0.334 MHz/90% RH                       |                               |                 |                        |             |      |
| SAW                        | PANI    | DMF             | PVB              | --          | 0.5 ml/h  | 10                   | 12                    | 100 °C for 2 h | PANI/PV B             | NFs        | 100-200 nm | ~75 kHz/%RH from 20 to 90%RH           | RT                            | 0.5%-90% RH     | 1s/2s                  | Humidity    | [77] |
| SAW                        | PVP     | ethanol         | CeO <sub>2</sub> | --          | --        | 12                   | 12                    | 65 °C for 12 h | CeO <sub>2</sub> -PVP | NFs        | 450 nm     | ~2.5 MHz/fro m 11% to 95% RH           | RT                            | 11%-95% RH      | ~16s/16s               | Humidity    | [78] |
| SAW                        | PVP     | DI water        | PVP              | --          | --        | 12                   | 8.5                   | --             | PVP                   | NFs        | 340 nm     | 5.6kHz/1 %                             | RT                            | 0.125-1%        | 10s/200s               | Hydrogen    | [79] |
| SAW                        | PVP     | alcohol         | MWCNTs, Nafion   | --          | 0.2 ml/h  | 15                   | 10                    | --             | MWCNT s/Nafion        | NFs        | --         | 400 kHz/%RH in the range of 10%-80% RH | RT                            | 1%-80%RH        | 3s/--                  | humidity    | [80] |
| QCM                        | PVP     | ethanol         | PVP              | --          | 100 µl/h  | 19                   | 10                    | --             | PVP                   | Fs         | 7-12 µm    | ~220 Hz/5 mg/l                         | RT                            | 5-30 mg/l       | 500s/2700s             | ethanol     | [81] |
| QCM                        | PEI, PS | Water, ethanol, | PS, PEI          | --          | 4         | 20                   | 15                    | dried          | PEI-PS                | NFs        | 110 -      | 19                                     | RT                            | 3-140           | --                     | formaldeh   | [82] |

| Electrospinning parameters |                   |                              |                   |             |           |                      |                       |                                   | Sensing Performance |            |            |                                                |                               |                 |                        |                 |      |
|----------------------------|-------------------|------------------------------|-------------------|-------------|-----------|----------------------|-----------------------|-----------------------------------|---------------------|------------|------------|------------------------------------------------|-------------------------------|-----------------|------------------------|-----------------|------|
| Sensing Platform           | Polymer           | Solvent                      | Precursor         | Needle Type | Flow Rate | Applied Voltage (KV) | Working Distance (cm) | Post-treatment                    | Material            | Morphology | Diameter   | Response                                       | Optimum Operating Temperature | Detection Range | Response/Recovery Time | Analyte Gas     | Ref. |
|                            |                   | THF, DMF                     |                   |             | ml/h      |                      |                       | at 25 °C in vacuum for 2 h        |                     |            | 870 nm     | Hz/140 ppm                                     |                               | ppm             |                        | aldehyde        |      |
| QCM                        | PS                | Water, ethanol, THF, DMF     | PEI, PA 6         | --          | 1 ml/h    | 20                   | 15                    | dried at 25 °C in vacuum for 12 h | PEI-PA 6            | NFN        | 26 nm      | 52.8 Hz/100 ppm                                | RT                            | 50 ppb-100 ppm  | 100s/--                | formaldehyde    | [83] |
| QCM                        | PVA               | H <sub>2</sub> O and ethanol | PAA               | --          | --        | 20                   | 5                     | --                                | PAA/PVA             | NFs        | 350 nm     | 60 Hz /1 ppm                                   | RT                            | 130 ppb-200 ppm | 10min/60min            | NH <sub>3</sub> | [84] |
| QCM                        | PS- <i>b</i> -PMA | Acetone and DMF              | PS- <i>b</i> -PMA | --          | 0.8 ml/h  | 25                   | 19                    | dried in vacuum at RT for 1 h     | PS- <i>b</i> -PMA   | NFs        | 261-744 nm | 28.2 Hz/50 ppm                                 | RT                            | 1.5-50 ppm      | --                     | NH <sub>3</sub> | [85] |
| QCM                        | PA and PS         | DMF and ethanol              | --                | --          | 1 ml/h    | 25                   | 19                    | dried for 1 h at 70 °C in vacuum  | PA/PS               | NFs        | 488 nm     | 2.1 Hz/25 ppm                                  | RT                            | 1.5-50 ppm      | --                     | NH <sub>3</sub> | [86] |
| QCM                        | PVA and PAA       | DI water                     | --                | --          | --        | 15                   | 10                    | dried at 80 °C in vacuum for 2 h  | PVA-PAA             | NFs        | 200-330 nm | 40 Hz/50 ppm at 0%RH<br>330 Hz/50 ppm at 60%RH | RT                            | 50-200 ppm      | --                     | NH <sub>3</sub> | [87] |

| Electrospinning parameters               |         |                                   |                                                               |             |           |                      |                       |                                  | Sensing Performance  |            |               |                                                                                         |                               |                 |                        |                  |         |
|------------------------------------------|---------|-----------------------------------|---------------------------------------------------------------|-------------|-----------|----------------------|-----------------------|----------------------------------|----------------------|------------|---------------|-----------------------------------------------------------------------------------------|-------------------------------|-----------------|------------------------|------------------|---------|
| Sensing Platform                         | Polymer | Solvent                           | Precursor                                                     | Needle Type | Flow Rate | Applied Voltage (KV) | Working Distance (cm) | Post-treatment                   | Material             | Morphology | Diameter      | Response                                                                                | Optimum Operating Temperature | Detection Range | Response/Recovery Time | Analyte Gas      | Ref.    |
| QCM                                      | PS      | THF, DMF, acetic acid and ethanol | titanium tetraisopropoxide, PEI                               | --          | 4 ml/h    | 20                   | 20                    | at 450 °C for 5 h in air         | PEI-TiO <sub>2</sub> | NFs        | 625 nm        | 13.7/100 ppm                                                                            | RT                            | 1-100 ppm       | 120s/--                | formaldehyde     | [88]    |
| QCM                                      | PS      | THF, DMF and DI water             | carboxyl graphene (G-COOH), PS                                | --          | 1 ml/h    | 25                   | 19                    | dried at 80 °C in vacuum for 1 h | G-COOH/PS            | NFs        | 569 nm        | 3.5 Hz/40 ppm                                                                           | RT                            | 1-40 ppm        | --                     | NH <sub>3</sub>  | [89]    |
| Optical (photoluminescence spectroscopy) | PAN     | DMF                               | --                                                            | 0.7 mm      | 3 ml/h    | 25                   | 25                    | --                               | PAN/ZnO              | NFs        | 250-350 nm    | NBE= 0.83 ± 0.04<br>DLE= 1.31 ± 0.03                                                    | RT                            | 150 ppm         | --                     | ethanol          | [90]    |
| Optical (FTIR spectroscopy)              | PAN     | --                                | Fe <sub>2</sub> O <sub>3</sub> , ZnO, Sb-SnO <sub>2</sub> NPs | --          | --        | --                   | --                    | --                               | PAN-MO <sub>x</sub>  | NFs        | 50 - 150 nm   | Highest response for PAN-Fe <sub>2</sub> O <sub>3</sub>                                 | RT                            | 2000 ppm        | --                     | CO <sub>2</sub>  | [91]    |
| Optical (fluorescence quenching)         | PS      | DMF                               | <b>P</b>                                                      | --          | 0.6 ml/h  | 25                   | 25                    | 40 °C for 12 h                   | <b>P</b>             | NFs        | 800 - 1000 nm | fluorescence quenching efficiency is PA>TNT>DNT>NB with values of 85%, 65%, 25% and 12% | RT                            | 0.5-3 mM        | --                     | PA, TNT, DNT, NB | [92-93] |
| Optical (absorbance)                     | PAA     | water                             | --                                                            | --          | 1 ml/h    | 18.5                 | 22                    | --                               | PAA                  | NFs        | 0.59± 0.15 μm | 2 dB/95% RH                                                                             | RT                            | 30%-95%         | 340ms/210 ms           | Humidity         | [94]    |



| Sensing Platform                 | Electrospinning parameters |                                                                    |                |                                      |            |                      |                       |                         |            | Material       | Morphology                      | Diameter          | Sensing Performance           |                    |                             |             |         | Ref. |
|----------------------------------|----------------------------|--------------------------------------------------------------------|----------------|--------------------------------------|------------|----------------------|-----------------------|-------------------------|------------|----------------|---------------------------------|-------------------|-------------------------------|--------------------|-----------------------------|-------------|---------|------|
|                                  | Polymer                    | Solvent                                                            | Precursor      | Needle Type                          | Flow Rate  | Applied Voltage (KV) | Working Distance (cm) | Post-treatment          | Response   |                |                                 |                   | Optimum Operating Temperature | Detection Range    | Response/Recovery Time      | Analyte Gas |         |      |
| Optical (fluorescence intensity) | --                         | HFP, Toluene                                                       | DCM, PCL, PDMS | --                                   | 1 ml/h     | 25                   | 20                    | --                      | PDMS - PCL | Core-shell NFs | 570±192 nm                      | 24/100%           | RT                            | 20-100%            | 0.49 ± 0.13s / 0.70 ± 0.15s | oxygen      | [95]    |      |
| Optical (luminescence)           | PS                         | 2-butanone, cationic surfactant hexadecyltrimethyl ammoniumbromide | PtTFPP         | a hypodermic needle with ID = 0.2 mm | 0.5 ml/min | 10                   | 10                    | 80 °C at 1 mbar for 1 h | PtTFPP     | Band like      | Width: 620 nm thickness: 100 nm | --                | RT                            | 100%               | 2.2s/-                      | oxygen      | [96-97] |      |
| Optical (fluorescence intensity) | PPI                        | DMAc                                                               | --             | --                                   | 1 ml/h     | 16                   | 12                    | 60 °C                   | PPI        | NFs            | 350 ± 54nm                      | ~0.95 a.u./50 ppm | RT                            | 1.25 ppm – 100 ppm | 10s/--                      | HCl         | [98]    |      |

PVA (polyvinyl alcohol); PEI (Polyethyleneimine); PANI (polyaniline); PMMA (Polymethyl methacrylate); PS (polystyrene); PVP (Polyvinylpyrrolidone); PAA (polyacrylic acid); PAN (Polyacrylonitrile); DMF (Dimethyl Formamide); DMSO (Dimethyl Sulfoxide); THF (Tetra Hydro Furan); PA polymer (Phenyl acetic acid); PPy (polypyrrole); PPI (porphyrinated polyimide); PCL (polycaprolactone); BPO (benzoyl peroxide); HCSA (Camphorsulfonic acid); PEO (polyethylene); CSA ((±)-10-camphorsulfonic acid); LPG (liquefied petroleum gas); HCl (hydrochloric acid); RT (room temperature); DI (distilled water); OD (outer diameter); ID (inner diameter); NFs (nanofibers); NTs (nanotubes); NWs (nanowires); HNFs (hollow nanofibers); NSs (nanosheets); NRs (nanorods); NRbs (nanoribbons); HFs (hollow fibers); rGO (reduced graphene oxide); RH (relative humidity); MWCNTs (multi carbon nanotubes); CNTs (carbon nanotubes); NFN (nanofiber net); NBE (near band emission); DLE (deep level emission); PA (picric acid), TNT (trinitrotoluene), DNT (2,4-dinitrotoluene), NB (nitrobenzene); **P** (benzothiophene based conjugated polymer with sulfur-containing fused rings as the backbone); HFIP (1,1,1,3,3,3-hexafluoro-2-propanol); DCM (Dichloromethane);

PtTFPP (platinum-tetra(pentafluorophenyl) porphyrine); PEDOT (polyethylenedioxythiophene); PSSA (poly(styrene sulfonic acid)); PVB (poly(vinyl butyral)); PVDF (poly(vinylidene fluoride)); DMAc (*N,N'*-Dimethyl acetamide)

**Table S2:** Sensing performance of electrospun pure MOx nanofibers categorized based on the analyte gas.

| Material                                 | Morphology | Diameter (nm) | Operating Temperature (°C) | Response       | Analyte gas     | Response /Recovery time | Reference    |
|------------------------------------------|------------|---------------|----------------------------|----------------|-----------------|-------------------------|--------------|
| TiO <sub>2</sub>                         | NFs        | 400 – 500     | 200                        | 4.4/25 ppm     | CO              | 32–86 s/ 84–109 s       | [99]         |
| TiO <sub>2</sub>                         | NFs        | 350 – 500     | 180                        | 3.4/25 ppm     | CO              | 32–86 s/ 84–109 s       | [100]        |
| TiO <sub>2</sub>                         | HNFs       | 200           | RT                         | Rg 70K/0.1 ppm | CO              | -                       | [101]        |
| SnO <sub>2</sub>                         | NFs        | 200 – 400     | 300                        | 3.8/500 ppm    | CO              | 260 s/15 min            | [102]        |
| ZnO                                      | NFs        | 35 – 150      | 200                        | 1.51/2 ppm     | CO              | 168–237 s/270–350 s     | [103]        |
| In <sub>2</sub> O <sub>3</sub>           | NFs        | 100           | 300                        | ~540%/100 ppm  | CO              | -                       | [8]          |
| TiO <sub>2</sub>                         | NRs        | 500           | 500                        | 9.0/10 ppm     | Acetone         | 11–14 s/4–8 s           | [28]         |
| WO <sub>3</sub>                          | NFs        | 275           | 270                        | 55.6/50 ppm    | Acetone         | 6-13 s/4-9 s            | [104]        |
| WO <sub>3</sub>                          | NTs        | 200           | 250                        | 19.7/40 ppm    | Acetone         | 5 s/22 s                | [105]        |
| SnO <sub>2</sub>                         | NBs        | 140           | 260                        | 6.7/5 ppm      | Acetone         | 38 s / 9 s              | [106]        |
| ZnO                                      | HNFs       | 145           | 220                        | 7.1/1 ppm      | Acetone         | 12–17 s/11–23 s         | [107]        |
| ZnO                                      | NTs        | 95            | 500                        | 12.3/2000 ppm  | Acetone         | 5 s/10 s                | [108]        |
| In <sub>2</sub> O <sub>3</sub>           | HNFs       | 250 – 310     | 300                        | 151/5 ppm      | Acetone         | 5 s/2 s                 | [109]        |
| TiO <sub>2</sub>                         | NFs        | 120 – 200     | 450                        | 30/50 ppm      | NO <sub>2</sub> | 2–4 min/20 s            | [110]        |
| WO <sub>3</sub>                          | NFs        | 100           | 75                         | 12.4/400 ppb   | NO <sub>2</sub> | 33 min/38 min           | [3, 110-111] |
| SnO <sub>2</sub>                         | NFs        | 200 – 400     | 185                        | 368/50 ppm     | NO <sub>2</sub> | 400 s/200 s             | [102, 105]   |
| SnO <sub>2</sub>                         | HNFs       | 300–500       | 300                        | 81.4/2 ppm     | NO <sub>2</sub> | 55 s/5 min              | [3, 111-112] |
| In <sub>2</sub> O <sub>3</sub>           | NRs        | 20 – 300      | 200                        | ~68.5/12 ppm   | NO <sub>2</sub> | 43 min/93 min           | [9, 104]     |
| $\alpha$ -Fe <sub>2</sub> O <sub>3</sub> | NFs        | 150 – 280     | 300                        | 2.3/100 ppm    | Ethanol         | 3 s/5 s                 | [105, 113]   |
| SnO <sub>2</sub>                         | NTs        | 200           | 300                        | 76/500 ppm     | Ethanol         | 12 s/8 s                | [113-114]    |
| SnO <sub>2</sub>                         | NFs        | 100           | 330                        | 4.5/10 ppm     | Ethanol         | 13 s/13.9 s             | [14-15]      |

| <b>Material</b>                | <b>Morphology</b> | <b>Diameter (nm)</b> | <b>Operating Temperature (°C)</b> | <b>Response</b> | <b>Analyte gas</b> | <b>Response /Recovery time</b> | <b>Reference</b> |
|--------------------------------|-------------------|----------------------|-----------------------------------|-----------------|--------------------|--------------------------------|------------------|
| In <sub>2</sub> O <sub>3</sub> | NFs               | 160 – 200            | 300                               | 379/15000 ppm   | Ethanol            | 1 s/5 s                        | [114-115]        |
| In <sub>2</sub> O <sub>3</sub> | NFs               | 30 – 100             | 220                               | ~3.75/30 ppm    | Ethanol            | 6 s/10 s                       | [39, 106]        |
| Co <sub>3</sub> O <sub>4</sub> | NFs               | 100 – 200            | 301                               | 51.2/100 ppm    | Ethanol            | 7.9s-22.7 s/58.7s-2.4 s        | [43]             |
| SnO <sub>2</sub>               | NTs               | 80 – 400             | 150                               | 2.4/1.0 ppm     | H <sub>2</sub>     | 21 s/333 s                     | [14-15]          |
| ZnO                            | NTs               | 200                  | 200                               | 3.6/100 ppm     | H <sub>2</sub>     | 20 min/10 min                  | [102, 116]       |
| ZnO                            | NFs               | 250                  | 350                               | 109.1/10 ppm    | H <sub>2</sub>     | -                              | [102, 117]       |
| ZnO                            | NFs               | 500 – 600            | RT                                | 12.61/100 ppm   | Formaldehyde       | 32 s/17 s                      | [107, 118]       |
| In <sub>2</sub> O <sub>3</sub> | NFs               | 150 - 200            | 340                               | 3.11/100 ppm    | Formaldehyde       | 18 s/17 s                      | [118-119]        |
| In <sub>2</sub> O <sub>3</sub> | NWs               | 120                  | RT                                | 141.1/20 ppm    | H <sub>2</sub> S   | 199 s/317 s                    | [57]             |
| In <sub>2</sub> O <sub>3</sub> | NTs               | 80                   | RT                                | 166.6/20 ppm    | H <sub>2</sub> S   | 287 s/636 s                    | [57]             |
| In <sub>2</sub> O <sub>3</sub> | NTs               | 370                  | 340                               | 5.88/40 ppm     | Toluene            | 3 s/17 s                       | [39, 120]        |
| WO <sub>3</sub>                | NFs               | 200                  | 200                               | 5.5/100 ppm     | NH <sub>3</sub>    | 1 s/5 s                        | [105]            |

NBs (nanobelts)

**Table S3:** Sensing performance of electrospun metal doped MOx nanofibers categorized based on the analyte gas.

| Material                                 | Structure (NTs/NFs/HNFs/NRs/NWs) | Dopant                         | Temperature (°C) | Response      | Detection Limit | Response/recovery time | Analyte gas | Reference |
|------------------------------------------|----------------------------------|--------------------------------|------------------|---------------|-----------------|------------------------|-------------|-----------|
| SnO <sub>2</sub>                         | HNFs                             | Y                              | 300              | 174/500 ppm   | 50 ppm          | 9-30s/6-9s             | Acetone     | [22, 121] |
| SnO <sub>2</sub>                         | HNFs                             | Ni                             | 340              | 64.9/100 ppm  | 2 ppm           | 7s/30s                 | Acetone     | [122]     |
| SnO <sub>2</sub>                         | NFs                              | Pd                             | 275              | 98.8/100 ppm  | 1 ppm           |                        | Acetone     | [123]     |
| SnO <sub>2</sub>                         | HNFs                             | Ag                             | 160              | 117/200 ppm   | 5 ppm           | 6s/10s                 | Acetone     | [124]     |
| $\alpha$ -Fe <sub>2</sub> O <sub>3</sub> | NTs                              | La                             | 240              | 26/50 ppm     | 1 ppm           | 3s/10s                 | Acetone     | [125]     |
| $\alpha$ -Fe <sub>2</sub> O <sub>3</sub> | NTs                              | Nd                             | 240              | 44/50 ppm     | 500 ppb         | 19s/50s                | Acetone     | [126]     |
| $\alpha$ -Fe <sub>2</sub> O <sub>3</sub> | NTs                              | Sm                             | 240              | 33/50 ppm     | 500 ppb         | 6s/11s                 | Acetone     | [127]     |
| $\alpha$ -Fe <sub>2</sub> O <sub>3</sub> | NTs                              | Ce                             | 240              | 21.5/50 ppm   | 1 ppm           | 3s/8s                  | Acetone     | [128]     |
| $\alpha$ -Fe <sub>2</sub> O <sub>3</sub> | NTs                              | Ca                             | 200              | 24.9/100      | 5 ppm           | 1s/3s                  | Acetone     | [129]     |
| ZnO                                      | NFs                              | Ce                             | 230              | 71.2/500 ppm  | 10 ppm          |                        | Acetone     | [130]     |
| ZnO                                      | HNFs                             | Ce                             | 260              | 75.04/100 ppm | 5 ppm           | -                      | Acetone     | [131]     |
| ZnO                                      | NFs                              | Mn                             | 340              | 76.2/50 ppm   | 50 ppm          | 17s/4s                 | Acetone     | [132]     |
| ZnO                                      | NFs                              | Co                             | 360              | 16/100 ppm    | 5 ppm           | 6s/4s                  | Acetone     | [133]     |
| ZnO                                      | NFs                              | La                             | 340              | 64/200 ppm    | -               | 16s/8s                 | Acetone     | [134]     |
| WO <sub>3</sub>                          | NFs                              | La <sub>2</sub> O <sub>3</sub> | 350              | 12.7/100 ppm  | 0.8 ppm         |                        | Acetone     | [135]     |
| WO <sub>3</sub>                          | HNFs                             | Cu                             | 300              | 6.43/20 ppm   | 0.25 ppm        | 5s/20s                 | Acetone     | [136]     |
| WO <sub>3</sub>                          | Hemitube                         | Pt                             | 350              | 4.11/2 ppm    | 120 ppb         | -                      | Acetone     | [137]     |
| In <sub>2</sub> O <sub>3</sub>           | NTs                              | Eu                             | 240              | 20/20 ppm     | 200 ppb         | 3s/90s                 | Acetone     | [138]     |
| $\alpha$ -Fe <sub>2</sub> O <sub>3</sub> | NTs                              | Al <sub>2</sub> O <sub>3</sub> | 240              | 41.8/50 ppm   | 300 ppb         | 20s/60s                | Ethanol     | [22]      |
| $\alpha$ -Fe <sub>2</sub> O <sub>3</sub> | NTs                              | Ca                             | 200              | 26.8/100      | 5 ppm           | 1s/26s                 | Ethanol     | [129]     |
| SnO <sub>2</sub>                         | NFs                              | Cu                             | 300              | 56/500 ppm    | 5 ppm           | 1s/10s                 | Ethanol     | [139]     |
| SnO <sub>2</sub>                         | HNFs                             | Pr                             | 300              | 64.33/200 ppm | 1 ppm           | 116s/11s               | Ethanol     | [140-141] |
| SnO <sub>2</sub>                         | NFs                              | Sr                             | 260              | 18.9/100 ppm  | -               | 2s/8s                  | Ethanol     | [142]     |

| Material                         | Structure (NTs/NFs/HNFs/NRs/NWs) | Dopant                         | Temperature (°C) | Response      | Detection Limit | Response/recovery time | Analyte gas      | Reference  |
|----------------------------------|----------------------------------|--------------------------------|------------------|---------------|-----------------|------------------------|------------------|------------|
| SnO <sub>2</sub>                 | HNFs                             | Yb                             | 340              | 170/500 ppm   | -               | 7s/8s                  | Ethanol          | [139, 143] |
| SnO <sub>2</sub>                 | HNFs                             | Ce                             | 250              | ~265/50 ppm   | -               | -                      | Ethanol          | [144]      |
| SnO <sub>2</sub>                 | NFs                              | Fe                             | 300              | 15.3/100 ppm  | 10 ppm          | 1s/3s                  | Ethanol          | [145]      |
| SnO <sub>2</sub>                 | NFs                              | Co                             | 300              | 40.1/100 ppm  | 2 ppm           | -                      | Ethanol          | [146]      |
| ZnO                              | NTs                              | In                             | 275              | 81.7/100 ppm  | -               | -                      | Ethanol          | [48]       |
| ZnO                              | NFs                              | Er                             | 240              | 37.3/200 ppm  | 1 ppm           | 12s/3s                 | Ethanol          | [132]      |
| ZnO                              | NFs                              | Al                             | 250              | 8.6/100 ppm   | -               | 5s/9s                  | Ethanol          | [11]       |
| ZnO                              | NFs                              | Cr <sub>2</sub> O <sub>3</sub> | 300              | 24/100 ppm    | 1 ppm           | 1s/5s                  | Ethanol          | [41]       |
| In <sub>2</sub> O <sub>3</sub>   | NWs                              | Co                             | 300              | 16.5/100 ppm  | -               | 2s/3s                  | Ethanol          | [140, 147] |
| In <sub>2</sub> O <sub>3</sub>   | NFs                              | Pd                             | 200              | 18/50 ppm     | 1 ppm           | 1s/10s                 | Ethanol          | [148-149]  |
| In <sub>2</sub> O <sub>3</sub>   | NTs                              | Mg                             | 250              | 25.82/100 ppm | -               | -                      | Ethanol          | [12, 150]  |
| In <sub>2</sub> O <sub>3</sub>   | NTs                              | Eu <sub>2</sub> O <sub>3</sub> | 260              | 44/50 ppm     | 0.2 ppm         | 3s/21s                 | Ethanol          | [151]      |
| In <sub>2</sub> O <sub>3</sub>   | NFs                              | Au                             | 140              | 13.8/500 ppm  | 50 ppm          | 12s/24s                | Ethanol          | [25]       |
| SnO <sub>2</sub>                 | NFs                              | Co <sub>3</sub> O <sub>4</sub> | 300              | 38/100 ppm    | -               | -                      | Ethanol          | [152]      |
| NiO                              | NTs                              | Pt                             | 400              | 11.7/100 ppm  | 1 ppm           | -                      | Ethanol          | [153]      |
| ZnO-SnO <sub>2</sub>             | HNFs                             | Ag                             | 200              | 128.6/100 ppm | 1 ppm           | -                      | Ethanol          | [154]      |
| α-Fe <sub>2</sub> O <sub>3</sub> | NWs                              | Pt                             | 175              | 157/10 ppm    | -               | -                      | H <sub>2</sub> S | [141]      |
| ZnO                              | NFs                              | Cu                             | 230              | 18.7/10 ppm   | -               | 18s/20s                | H <sub>2</sub> S | [143, 155] |
| In <sub>2</sub> O <sub>3</sub>   | NTs                              | Mg                             | 150              | 173.14/10 ppm | -               | -                      | H <sub>2</sub> S | [12, 121]  |
| In <sub>2</sub> O <sub>3</sub>   | NFs                              | V                              | 90               | 13.9/50 ppm   | -               | 15s/18s                | H <sub>2</sub> S | [144, 156] |
| In <sub>2</sub> O <sub>3</sub>   | NFs                              | Pt                             | 200              | 1490/600 ppm  | 50 ppm          | 60s/120s               | H <sub>2</sub> S | [24]       |
| SnO <sub>2</sub>                 | HNFs                             | CuO                            | 125              | 410/10 ppm    | -               | -                      | H <sub>2</sub> S | [157]      |
| SnO <sub>2</sub>                 | NFs                              | Pt                             | 300              | 5100/20 ppm   | -               | -                      | H <sub>2</sub> S | [150]      |
| WO <sub>3</sub>                  | NFs                              | Pd                             | 350              | 1.36/1 ppm    | 1 ppm           | -                      | H <sub>2</sub> S | [158]      |
| TiO <sub>2</sub>                 | NFs                              | Ag                             | 350              | ~120/1 ppm    | 1 ppm           | -                      | H <sub>2</sub> S | [159]      |

| Material                                 | Structure (NTs/NFs/HNFs/NRs/NWs) | Dopant                        | Temperature (°C) | Response      | Detection Limit | Response/recovery time | Analyte gas                   | Reference  |
|------------------------------------------|----------------------------------|-------------------------------|------------------|---------------|-----------------|------------------------|-------------------------------|------------|
| SnO <sub>2</sub>                         | NTs                              | Al                            | 240              | 7.82/1000 ppb | -               | -                      | Formaldehyde                  | [23]       |
| SnO <sub>2</sub>                         | HNFs                             | Pd                            | 160              | 18.8/100 ppm  | -               | 2s/7s                  | Formaldehyde                  | [160]      |
| In <sub>2</sub> O <sub>3</sub>           | NTs                              | Er                            | 260              | 12/20 ppm     | 100 ppb         | 5s/38s                 | Formaldehyde                  | [122, 161] |
| In <sub>2</sub> O <sub>3</sub>           | Ruptured NTs                     | Nd                            | 240              | 46.8/100 ppm  | 100 ppb         | 8s/22s                 | Formaldehyde                  | [162]      |
| In <sub>2</sub> O <sub>3</sub>           | NTs                              | Nd                            | 240              | 44.6/100 ppm  | 100 ppb         | 15s/50s                | Formaldehyde                  | [163]      |
| In <sub>2</sub> O <sub>3</sub>           | NTs                              | Sm                            | 240              | 54.37/100 ppm | 100 ppb         | 9s/40s                 | Formaldehyde                  | [164]      |
| In <sub>2</sub> O <sub>3</sub>           | NFs                              | Ag                            | 115              | 28/50 ppm     | 5 ppm           | 5s/10s                 | Formaldehyde                  | [165]      |
| $\alpha$ -Fe <sub>2</sub> O <sub>3</sub> | NTs                              | SnO <sub>2</sub>              | 220              | 25.4/500 ppm  | 1 ppm           | -                      | Formaldehyde                  | [166]      |
| SnO <sub>2</sub>                         | NFs                              | V <sub>2</sub> O <sub>5</sub> | 325              | 6.32/25 ppm   | -               | -                      | benzene                       | [167]      |
| SnO <sub>2</sub>                         | NFs                              | Al                            | 340              | 7.7/100 ppm   | 10 ppm          | -                      | H <sub>2</sub>                | [53]       |
| SnO <sub>2</sub>                         | NFs                              | Co                            | 330              | 24/100 ppm    | -               | 2s/3s                  | H <sub>2</sub>                | [149]      |
| ZnO                                      | NFs                              | Pr                            | 380              | 7.38/400 ppm  | -               | 51s/40s                | acetic acid                   | [29]       |
| ZnO                                      | NFs                              | Ni                            | 250              | 16.9/2000 ppm | -               | 5s/10s                 | C <sub>2</sub> H <sub>2</sub> | [26]       |
| SnO <sub>2</sub>                         | NFs                              | Au                            | 300              | 18.98/10 ppm  | 1 ppm           | -                      | CO                            | [168]      |
| SnO <sub>2</sub>                         | NFs                              | Au                            | 300              | 84/5ppm       | -               | 22s/235s               | CO                            | [169]      |
| ZnO                                      | NFs                              | Pd                            | 220              | 5.5/20 ppm    | 1 ppm           | 25-29s/12-17s          | CO                            | [33]       |
| NiO                                      | NTs                              | W                             | 375              | 8.74/200 ppm  | 15 ppm          | 178s/152s              | xylene                        | [170]      |
| TiO <sub>2</sub>                         | NFs                              | Pd                            | 180              | 38/2.1 ppm    | 0.16 ppm        | -                      | NO <sub>2</sub>               | [171]      |
| SnO <sub>2</sub>                         | NFs                              | Pt                            | 300              | 11.9/10 ppm   | 1 ppm           | -                      | Toluene                       | [172]      |
| WO <sub>3</sub>                          | NFs                              | Pd                            | 350              | 5.5/1 ppm     | 20 ppb          | 10.9s/16.1s            | Toluene                       | [158]      |
| WO <sub>3</sub>                          | NFs                              | Au                            | 250              | 229.7/100 ppm | 1 ppm           | 5-43 s/ 10-122 s       | n-butanol                     | [173]      |

**Table S4:** Sensing performance of electrospun MO<sub>x</sub>-MO<sub>x</sub> nanofibers categorized based on the analyte gas.

| Material                                                                                 | Structure                          | Diameter (nm) | Operating Temperature (°C) | Response       | Detection limit | Response/recovery time | Analyte gas     | Reference  |
|------------------------------------------------------------------------------------------|------------------------------------|---------------|----------------------------|----------------|-----------------|------------------------|-----------------|------------|
| NiO/SnO <sub>2</sub>                                                                     | Heterojunctions NFs                | 180           | 300                        | 27.5/100 ppm   | 50 ppb          | 2.9s/4.7s              | Ethanol         | [174]      |
| SiO <sub>2</sub> @SnO <sub>2</sub>                                                       | core-shell NFs                     | 160 – 320     | -                          | 37/200 ppm     | 50 ppm          | 13s/16s                | Ethanol         | [175]      |
| SnO <sub>2</sub> -ZnO                                                                    | Heterostructured NFs               | 50 – 80       | 300                        | 78/100 ppm     | 5 ppm           | 25s/9s                 | Ethanol         | [176]      |
| ZnO-SnO <sub>2</sub>                                                                     | HNFs                               | 150           | 260                        | 168.3/200 ppm  | 20 ppm          | 4-7s/4-5s              | Ethanol         | [16]       |
| SnO <sub>2</sub> /CeO <sub>2</sub>                                                       | NTs                                | 200           | 320                        | 49.1/100 ppm   | 50 ppm          | 11s/10s                | Ethanol         | [177]      |
| ZnO-SnO <sub>2</sub>                                                                     | Core-shell heterostructure         | 370           | 200                        | 392.29/100 ppm | 5 ppm           | 74s/12s                | Ethanol         | [178]      |
| SnO <sub>2</sub> /α-Fe <sub>2</sub> O <sub>3</sub>                                       | NTs                                | 65            | 200                        | 27.45/100 ppm  | 5 ppm           | 3s/14s                 | Ethanol         | [54]       |
| Sn-SnO <sub>2</sub> /C                                                                   | heterostructure NFs                | 350 – 400     | 220                        | 46.15/1000 ppm | 10 ppm          | -                      | Ethanol         | [179]      |
| SnO <sub>2</sub> /α-Fe <sub>2</sub> O <sub>3</sub>                                       | hierarchically Core-shell HNFs     | 100 – 200     | 340                        | 20.370/100 ppm | 2 ppm           | 15s/25s                | Ethanol         | [180]      |
| SnO <sub>2</sub> /ZnO                                                                    | Composite NFs                      | 60 – 80       | 360                        | 17.5/3000 ppm  | 27.7            | 5s/1s                  | Ethanol         | [181]      |
| ZnO-TiO <sub>2</sub>                                                                     | Hierarchical heterojunctions NFs   | 100 – 300 nm  | 320                        | 50.6/500 ppm   | 20 ppm          | 50.6s/5-10 s           | Ethanol         | [62]       |
| NiO-In <sub>2</sub> O <sub>3</sub>                                                       | Composite NFs                      | 152           | 300                        | 78/100 ppm     | 20 ppm          | -                      | Ethanol         | [182]      |
| Eu <sub>2</sub> O <sub>3</sub> -In <sub>2</sub> O <sub>3</sub>                           | Composite NTs                      | 160           | 260                        | 44/50 ppm      | 0.2 ppm         | 3s/21s                 | Ethanol         | [151]      |
| TiO <sub>2</sub> -SnO <sub>2</sub>                                                       | core-shell heterostructure NFs     | 120 – 250     | 280                        | 13.7/100 ppm   | 10 ppm          | 2s/60s                 | Acetone         | [183]      |
| SnO <sub>2</sub> -ZnO                                                                    | Heterojunctions NFs                | 120           | 300                        | 84/100 ppm     | 5 ppm           | 19s/9s                 | Acetone         | [184]      |
| SnO <sub>2</sub> /α-Fe <sub>2</sub> O <sub>3</sub>                                       | NTs                                | 65            | 200                        | 10.07/100 ppm  | 5 ppm           | 4s/12s                 | Acetone         | [54]       |
| SnO <sub>2</sub> /α-Fe <sub>2</sub> O <sub>3</sub>                                       | hierarchically Core-shell HNFs     | 100 – 200     | 340                        | 30.363/100 ppm | 2 ppm           | 5s/13s                 | Acetone         | [180]      |
| α-Fe <sub>2</sub> O <sub>3</sub> /SnO <sub>2</sub>                                       | Cage-like composite NFs            | 160           | 275                        | 5.3/100 ppm    | 100 ppm         | 1.5s/2.5s              | Acetone         | [185]      |
| ZnO-In <sub>2</sub> O <sub>3</sub>                                                       | Composite NTs                      | 300           | 280                        | 43.2/60 ppm    | 0.125 ppm       | 5s/25s                 | Acetone         | [186]      |
| In <sub>2</sub> O <sub>3</sub> -Fe <sub>2</sub> O <sub>3</sub>                           | Composite NTs                      | 130           | 240                        | 25/100 ppm     | 1 ppm           | 3s/7 s                 | Acetone         | [187]      |
| In <sub>2</sub> O <sub>3</sub> -WO <sub>3</sub>                                          | Heterojunction NFs                 | 170           | 275                        | 12.9/50 ppm    | 0.4 ppm         | 6s/64s                 | Acetone         | [63]       |
| α-Fe <sub>2</sub> O <sub>3</sub> /SnO <sub>2</sub>                                       | Heterostructure NTs                | 90            | 300                        | 33.4/100 ppm   | 1 ppm           | 4.9-5.9 s/15.8-22.5s   | Acetone         | [188]      |
| SnO <sub>2</sub> /In <sub>2</sub> O <sub>3</sub>                                         | Heterojunction NTs                 | 80 – 120      | 300                        | 118/50 ppm     | 250 ppb         | 60s/97s                | Formaldehyde    | [60]       |
| SnO <sub>2</sub> /In <sub>2</sub> O <sub>3</sub>                                         | Hetero HNFs (nano needles on NTs)  | 450 – 500     | 290                        | 13.85/10 ppm   | 0.5 ppm         | 20s/40s                | Formaldehyde    | [61]       |
| SnO <sub>2</sub> /In <sub>2</sub> O <sub>3</sub>                                         | hetero-NFs                         | 100 – 250     | 375                        | 7.5/10 ppm     | 0.5 ppm         | -                      | Formaldehyde    | [189]      |
| In <sub>2</sub> O <sub>3</sub> -Fe <sub>2</sub> O <sub>3</sub>                           | Composite NTs                      | 130           | 260                        | 15/100 ppm     | 1 ppm           | 4s/7 s                 | Formaldehyde    | [187]      |
| In <sub>2</sub> O <sub>3</sub> – SnO <sub>2</sub>                                        | Heterojunction NRs                 | 230 – 470     | RT                         | 8.98/100 ppm   | 0.1 ppm         | 4.67 s/-               | NO <sub>x</sub> | [19]       |
| ZnO-SnO <sub>2</sub>                                                                     | Heterostructure (NF-NWstem-branch) | 120           | 350                        | 35/0.1 ppm     | 0.1 ppm         | -                      | NO <sub>2</sub> | [190]      |
| SnO <sub>2</sub> -ZnO                                                                    | Composite NFs                      | 55 – 80       | 200                        | 105/4 ppm      | 400 ppb         | -                      | NO <sub>2</sub> | [191]      |
| In <sub>2</sub> O <sub>3</sub><br>Beads@TiO <sub>2</sub> -In <sub>2</sub> O <sub>3</sub> | Beads on composite NFs             | 150 – 250     | RT                         | 95/97 ppm      | 0.3 ppm         | 4.3s/-                 | NO <sub>2</sub> | [45]       |
| In <sub>2</sub> O <sub>3</sub> /TiO <sub>2</sub>                                         | Mesoporous NFs                     | 200           | RT                         | 41.1%/97 ppm   | 97 ppb          | 3s/-                   | NO <sub>x</sub> | [20]       |
| Al <sub>2</sub> O <sub>3</sub> -In <sub>2</sub> O <sub>3</sub>                           | Mesoporous composite NFs           | 200           | RT                         | 100/97 ppm     | 291 ppb         | 28s/-                  | NO <sub>x</sub> | [18]       |
| SnO <sub>2</sub> -ZnO                                                                    | HNFs                               | 80 – 160      | 190                        | 15.6/50 ppm    | 1 ppm           | 6-11s/12-23s           | Toluene         | [192]      |
| NiO-SnO <sub>2</sub>                                                                     | Composite NFs                      | 80 – 160      | 330                        | 11/50 ppm      | 50 ppm          | 1.2 s/ 4 s             | Toluene         | [60, 193]  |
| ZnO-SnO <sub>2</sub>                                                                     | Composite NFs                      | 100 – 200     | 360                        | 9.8/100 ppm    | 10 ppm          | 5s/6s                  | Toluene         | [183, 194] |



| Material                                         | Structure                                             | Diameter (nm) | Operating Temperature (°C) | Response      | Detection limit | Response/recovery time | Analyte gas      | Reference |
|--------------------------------------------------|-------------------------------------------------------|---------------|----------------------------|---------------|-----------------|------------------------|------------------|-----------|
| In <sub>2</sub> O <sub>3</sub> -SnO <sub>2</sub> | Composite NFs                                         | 40 – 100      | 80                         | 8.1/1 ppm     | 50 ppb          | 1s/6s                  | Trimethylamine   | [2]       |
| NiO/ZnO                                          | Heterojunction NFs                                    | 100           | 260                        | 892/100 ppm   | 0.5 ppm         | 30s/35s                | trimethylamine   | [195]     |
| In <sub>2</sub> O <sub>3</sub> -SnO <sub>2</sub> | Composite NFs                                         | 60 – 100      | 280                        | ~29/100 ppm   | 2 ppm           | 8s/15s                 | Methanol         | [196]     |
| SnO <sub>2</sub> -ZnO                            | Heterostructure HNFs                                  | 160 – 380     | 350                        | ~9.0/10 ppm   | 1 ppm           | 20s/40s                | Methanol         | [197]     |
| CuO/SnO <sub>2</sub>                             | Composite NFs                                         | ~300          | 200                        | 23/1 ppm      | 0.01 ppm        | 23s/25s                | H <sub>2</sub> S | [198]     |
| ZnO-CuO                                          | Composite NFs                                         | 150 – 200     | 150                        | 4489.9/10 ppm | 1 ppm           | -                      | H <sub>2</sub> S | [199]     |
| CuO/SnO <sub>2</sub>                             | Mixed NFs                                             | 110           | 300                        | 522/10 ppm    | 10 ppm          | 1s/305s                | H <sub>2</sub> S | [42]      |
| SnO <sub>2</sub> -CuO                            | Heterojunctions NFs                                   | 130 – 200     | 235                        | 95/10 ppm     | -               | 37s/80s                | CO               | [200]     |
| SnO <sub>2</sub> -C                              | Hierarchical heterostructured NFs (nanosheets on NFs) | 150 – 500     | 200                        | ~16.5/100 ppm | 1 ppm           | 4s/16s                 | H <sub>2</sub>   | [70]      |
| ZnO/CoNiO <sub>2</sub>                           | Composite HNFs                                        | 60 – 80       | 220                        | 240/100 ppm   | -               | 8s/11s                 | NH <sub>3</sub>  | [201]     |

NRs: Nanorods, NBs: Nanobelts

## References

- [1] Liang, X.; Kim, T.-H.; Yoon, J.-W.; Kwak, C.-H.; Lee, J.-H., *Sensors and Actuators B: Chemical* **2015**, *209*, 934-942.
- [2] Qi, Q.; Zou, Y.-C.; Fan, M.-H.; Liu, Y.-P.; Gao, S.; Wang, P.-P.; He, Y.; Wang, D.-J.; Li, G.-D., *Sensors and Actuators B: Chemical* **2014**, *203*, 111-117.
- [3] Giancaterini, L.; Emamjomeh, S. M.; De Marcellis, A.; Palange, E.; Resmini, A.; Anselmi-Tamburini, U.; Cantalini, C., *Sensors and Actuators B: Chemical* **2016**, *229*, 387-395.
- [4] Senthil, T.; Anandhan, S., *Journal of colloid and interface science* **2014**, *432*, 285-296.
- [5] Qi, Q.; Zhao, J.; Xuan, R.-F.; Wang, P.-P.; Feng, L.-L.; Zhou, L.-J.; Wang, D.-J.; Li, G.-D., *Sensors and Actuators B: Chemical* **2014**, *191*, 659-665.
- [6] Jang, B.-H.; Landau, O.; Choi, S.-J.; Shin, J.; Rothschild, A.; Kim, I.-D., *Sensors and Actuators B: Chemical* **2013**, *188*, 156-168.
- [7] Feng, Q.; Li, X.; Wang, J.; Gaskov, A. M., *Sensors and Actuators B: Chemical* **2016**, *222*, 864-870.
- [8] Lim, S. K.; Hwang, S.-H.; Chang, D.; Kim, S., *Sensors and Actuators B: Chemical* **2010**, *149*, 28-33.
- [9] Sowti Khiabani, P.; Hosseinmardi, A.; Marzbanrad, E.; Ghashghaie, S.; Zamani, C.; Keyanpour-Rad, M.; Raissi, B., *Sensors and Actuators B: Chemical* **2012**, *162*, 102-107.
- [10] Landau, O.; Rothschild, A., *Sensors and Actuators B: Chemical* **2012**, *171-172*, 118-126.
- [11] Zhao, M.; Wang, X.; Cheng, J.; Zhang, L.; Jia, J.; Li, X., *Current Applied Physics* **2013**, *13*, 403-407.
- [12] Zhao, C.; Huang, B.; Xie, E.; Zhou, J.; Zhang, Z., *Sensors and Actuators B: Chemical* **2015**, *207, Part A*, 313-320.
- [13] Zhang, H.-D.; Tang, C.-C.; Long, Y.-Z.; Zhang, J.-C.; Huang, R.; Li, J.-J.; Gu, C.-Z., *Sensors and Actuators A: Physical* **2014**, *219*, 123-127.

- [14] Ab Kadir, R.; Li, Z.; Sadek, A. Z.; Abdul Rani, R.; Zoolfakar, A. S.; Field, M. R.; Ou, J. Z.; Chrimes, A. F.; Kalantar-zadeh, K., *The Journal of Physical Chemistry C* **2014**, *118*, 3129-3139.
- [15] Zhang, Y.; He, X.; Li, J.; Miao, Z.; Huang, F., *Sensors and Actuators B: Chemical* **2008**, *132*, 67-73.
- [16] Wan, G. X.; Ma, S. Y.; Sun, X. W.; Sun, A. M.; Li, X. B.; Luo, J.; Li, W. Q.; Wang, C. Y., *Materials Letters* **2015**, *145*, 48-51.
- [17] Xu, L.; Song, H.; Dong, B.; Wang, Y.; Chen, J.; Bai, X., *Inorg. Chem.* **2010**, *49*, 10590-10597.
- [18] Gao, J.; Wang, L.; Kan, K.; Xu, S.; Jing, L.; Liu, S.; Shen, P.; Li, L.; Shi, K., *Journal of Materials Chemistry A* **2014**, *2*, 949-956.
- [19] Xu, S.; Gao, J.; Wang, L.; Kan, K.; Xie, Y.; Shen, P.; Li, L.; Shi, K., *Nanoscale* **2015**, *7*, 14643-14651.
- [20] Wu, H.; Kan, K.; Wang, L.; Zhang, G.; Yang, Y.; Li, H.; Jing, L.; Shen, P.; Li, L.; Shi, K., *CrystEngComm* **2014**, *16*, 9116-9124.
- [21] Liu, L.; Li, S.; Guo, X.; Wang, L.; Liu, L.; Wang, X., *Journal of Materials Science: Materials in Electronics* **2016**, *27*, 5153-5157.
- [22] Su, C.; Li, Y.; He, Y.; Liu, L.; Wang, X.; Liu, L., *Materials Science in Semiconductor Processing* **2015**, *39*, 49-53.
- [23] Wu, J.; Huang, Q.; Zeng, D.; Zhang, S.; Yang, L.; Xia, D.; Xiong, Z.; Xie, C., *Sensors and Actuators B: Chemical* **2014**, *198*, 62-69.
- [24] Zheng, W.; Lu, X.; Wang, W.; Li, Z.; Zhang, H.; Wang, Z.; Xu, X.; Li, S.; Wang, C., *Journal of Colloid and Interface Science* **2009**, *338*, 366-370.
- [25] Xu, X.; Fan, H.; Liu, Y.; Wang, L.; Zhang, T., *Sensors and Actuators B: Chemical* **2011**, *160*, 713-719.
- [26] Wang, X.; Zhao, M.; Liu, F.; Jia, J.; Li, X.; Cao, L., *Ceramics International* **2013**, *39*, 2883-2887.

- [27] Koo, W.-T.; Choi, S.-J.; Kim, N.-H.; Jang, J.-S.; Kim, I.-D., *Sensors and Actuators B: Chemical* **2016**, *223*, 301-310.
- [28] Bian, H.; Ma, S.; Sun, A.; Xu, X.; Yang, G.; Gao, J.; Zhang, Z.; Zhu, H., *Superlattices and Microstructures* **2015**, *81*, 107-113.
- [29] Wang, C.; Ma, S.; Sun, A.; Qin, R.; Yang, F.; Li, X.; Li, F.; Yang, X., *Sensors and Actuators B: Chemical* **2014**, *193*, 326-333.
- [30] Song, X.; Liu, L., *Sensors and Actuators A: Physical* **2009**, *154*, 175-179.
- [31] Han, L.; Andradý, A. L.; Ensor, D. S., *Sensors and Actuators B: Chemical* **2013**, *186*, 52-55.
- [32] Lou, Z.; Deng, J.; Wang, L.; Wang, R.; Fei, T.; Zhang, T., *RSC Advances* **2013**, *3*, 3131-3136.
- [33] Wei, S.; Yu, Y.; Zhou, M., *Materials Letters* **2010**, *64*, 2284-2286.
- [34] Choi, S. J.; Chattopadhyay, S.; Kim, J. J.; Kim, S. J.; Tuller, H. L.; Rutledge, G. C.; Kim, I. D., *Nanoscale* **2016**, *8*, 9159-9166.
- [35] Liu, C.; Chi, X.; Liu, X.; Wang, S., *Journal of Alloys and Compounds* **2014**, *616*, 208-212.
- [36] Katoch, A.; Sun, G.-J.; Choi, S.-W.; Byun, J.-H.; Kim, S. S., *Sensors and Actuators B: Chemical* **2013**, *185*, 411-416.
- [37] Bai, H.; Zhao, L.; Lu, C.; Li, C.; Shi, G., *Polymer* **2009**, *50*, 3292-3301.
- [38] Low, K.; Horner, C. B.; Li, C.; Ico, G.; Bosze, W.; Myung, N. V.; Nam, J., *Sensors and Actuators B: Chemical* **2015**, *207, Part A*, 235-242.
- [39] Lu, Q.; Wang, C.; Liu, S.; Ren, M., *Materials Transactions* **2011**, *52*, 1206-1210.
- [40] Cao, J.; Dou, H.; Zhang, H.; Mei, H.; Liu, S.; Fei, T.; Wang, R.; Wang, L.; Zhang, T., *Sensors and Actuators B: Chemical* **2014**, *198*, 180-187.
- [41] Wang, W.; Li, Z.; Zheng, W.; Huang, H.; Wang, C.; Sun, J., *Sensors and Actuators B: Chemical* **2010**, *143*, 754-758.

- [42] Katoch, A.; Kim, J. H.; Kim, S. S., *Journal of Nanoscience and Nanotechnology* **2015**, *15*, 8637-8641.
- [43] Yoon, J.-W.; Choi, J.-K.; Lee, J.-H., *Sensors and Actuators B: Chemical* **2012**, *161*, 570-577.
- [44] Choi, J.-K.; Hwang, I.-S.; Kim, S.-J.; Park, J.-S.; Park, S.-S.; Jeong, U.; Kang, Y. C.; Lee, J.-H., *Sensors and Actuators B: Chemical* **2010**, *150*, 191-199.
- [45] Wang, L.; Gao, J.; Wu, B.; Kan, K.; Xu, S.; Xie, Y.; Li, L.; Shi, K., *ACS Applied Materials and Interfaces* **2015**, *7*, 27152-27159.
- [46] Patil, P. T.; Anwane, R. S.; Kondawar, S. B., *Procedia Materials Science* **2015**, *10*, 195-204.
- [47] Wei, S.; Wang, S.; Zhang, Y.; Zhou, M., *Sensors and Actuators B: Chemical* **2014**, *192*, 480-487.
- [48] Huang, B.; Zhao, C.; Zhang, M.; Zhang, Z.; Xie, E.; Zhou, J.; Han, W., *Applied Surface Science* **2015**, *349*, 615-621.
- [49] Pang, Z.; Nie, Q.; Wei, A.; Yang, J.; Huang, F.; Wei, Q., *Journal of Materials Science* **2017**, *52*, 686-695.
- [50] Mao, Y.; Ma, S.; Li, X.; Wang, C.; Li, F.; Yang, X.; Zhu, J.; Ma, L., *Applied Surface Science* **2014**, *298*, 109-115.
- [51] Xiong, Y.; Xue, Q.; Ling, C.; Lu, W.; Ding, D.; Zhu, L.; Li, X., *Sensors and Actuators, B: Chemical* **2017**, *241*, 725-734.
- [52] Cao, Y.; Zou, X.; Wang, X.; Qian, J.; Bai, N.; Li, G.-D., *Sensors and Actuators B: Chemical* **2016**, *232*, 564-570.
- [53] Xu, X.; Sun, J.; Zhang, H.; Wang, Z.; Dong, B.; Jiang, T.; Wang, W.; Li, Z.; Wang, C., *Sensors and Actuators B: Chemical* **2011**, *160*, 858-863.
- [54] Zhao, C.; Hu, W.; Zhang, Z.; Zhou, J.; Pan, X.; Xie, E., *Sensors and Actuators B: Chemical* **2014**, *195*, 486-493.
- [55] Pinto, N. J.; Ramos, I.; Rojas, R.; Wang, P.-C.; Johnson Jr, A. T., *Sensors and Actuators B: Chemical* **2008**, *129*, 621-627.

- [56] Pinto, N. J.; Rivera, D.; Melendez, A.; Ramos, I.; Lim, J. H.; Johnson, A. T. C., *Sensors and Actuators B: Chemical* **2011**, *156*, 849-853.
- [57] Xu, L.; Dong, B.; Wang, Y.; Bai, X.; Liu, Q.; Song, H., *Sensors and Actuators B: Chemical* **2010**, *147*, 531-538.
- [58] Chi, X.; Liu, C.; Liu, L.; Li, S.; Li, H.; Zhang, X.; Bo, X.; Shan, H., *Materials Science in Semiconductor Processing* **2014**, *18*, 160-164.
- [59] Lee, C.-S.; Kim, I.-D.; Lee, J.-H., *Sensors and Actuators B: Chemical* **2013**, *181*, 463-470.
- [60] Liu, J.; Li, X.; Chen, X.; Niu, H.; Han, X.; Zhang, T.; Lin, H.; Qu, F., *New Journal of Chemistry* **2016**, *40*, 1756-1764.
- [61] Du, H.; Wang, J.; Sun, Y.; Yao, P.; Li, X.; Yu, N., *Sensors and Actuators B: Chemical* **2015**, *206*, 753-763.
- [62] Deng, J.; Yu, B.; Lou, Z.; Wang, L.; Wang, R.; Zhang, T., *Sensors and Actuators B: Chemical* **2013**, *184*, 21-26.
- [63] Feng, C.; Li, X.; Ma, J.; Sun, Y.; Wang, C.; Sun, P.; Zheng, J.; Lu, G., *Sensors and Actuators B: Chemical* **2015**, *209*, 622-629.
- [64] Qi, Q.; Wang, P.-P.; Zhao, J.; Feng, L.-L.; Zhou, L.-J.; Xuan, R.-F.; Liu, Y.-P.; Li, G.-D., *Sensors and Actuators B: Chemical* **2014**, *194*, 440-446.
- [65] Ji, S.; Li, Y.; Yang, M., *Sensors and Actuators B: Chemical* **2008**, *133*, 644-649.
- [66] Wang, Q.; Dong, X.; Pang, Z.; Du, Y.; Xia, X.; Wei, Q.; Huang, F., *Sensors (Switzerland)* **2012**, *12*, 17046-17057.
- [67] Li, Y.; Gong, J.; He, G.; Deng, Y., *Materials Chemistry and Physics* **2011**, *129*, 477-482.
- [68] Wang, Y.; Jia, W.; Strout, T.; Ding, Y.; Lei, Y., *Sensors* **2009**, *9*, 6752-6763.
- [69] Li, Y.; Ban, H.; Yang, M., *Sensors and Actuators B: Chemical* **2016**, *224*, 449-457.

- [70] Wang, Z.; Liu, S.; Jiang, T.; Xu, X.; Zhang, J.; An, C.; Wang, C., *RSC Advances* **2015**, 5, 64582-64587.
- [71] Yan, S.; Wu, Q., *Sensors and Actuators B: Chemical* **2014**, 205, 329-337.
- [72] Abideen, Z. U.; Katoch, A.; Kim, J.-H.; Kwon, Y. J.; Kim, H. W.; Kim, S. S., *Sensors and Actuators B: Chemical* **2015**, 221, 1499-1507.
- [73] Abideen, Z. U.; Park, J. Y.; Kim, H. W.; Kim, S. S., *Nanotechnology* **2017**, 28, 035501.
- [74] Kim, J. H.; Zheng, Y.; Mirzaei, A.; Kim, H. W.; Kim, S. S., *Journal of Electronic Materials* **2017**, 1-11.
- [75] Guo, J.; Liu, X.; Wang, H.; Sun, W.; Sun, J., *Materials Letters* **2017**, 209, 102-105.
- [76] Liu, S.; Sun, H.; Nagarajan, R.; Kumar, J.; Gu, Z.; Cho, J.; Kurup, P., *Sensors and Actuators A: Physical* **2011**, 167, 8-13.
- [77] Lin, Q.; Li, Y.; Yang, M., *Analytica Chimica Acta* **2012**, 748, 73-80.
- [78] Liu, Y.; Huang, H.; Wang, L.; Cai, D.; Liu, B.; Wang, D.; Li, Q.; Wang, T., *Sensors and Actuators B: Chemical* **2016**, 223, 730-737.
- [79] He, X.; Arsat, R.; Sadek, A. Z.; Wlodarski, W.; Kalantar-zadeh, K.; Li, J., *Sensors and Actuators B: Chemical* **2010**, 145, 674-679.
- [80] Sheng, L.; Dajing, C.; Yuquan, C., *Nanotechnology* **2011**, 22, 265504.
- [81] Aria, M. M.; Irajizad, A.; Astaraei, F. R.; Shariatpanahi, S. P.; Sarvari, R., *Measurement* **2016**, 78, 283-288.
- [82] Zhang, C.; Wang, X.; Lin, J.; Ding, B.; Yu, J.; Pan, N., *Sensors and Actuators B: Chemical* **2011**, 152, 316-323.
- [83] Ding, B.; Wang, X.; Yu, J.; Wang, M., *Journal of Materials Chemistry* **2011**, 21, 12784-12792.
- [84] Ding, B.; Yamazaki, M.; Shiratori, S., *Sensors and Actuators B: Chemical* **2005**, 106, 477-483.

- [85] Jia, Y.; Yan, C.; Yu, H.; Chen, L.; Dong, F., *Sensors and Actuators B: Chemical* **2014**, *203*, 459-464.
- [86] Jia, Y.; Yu, H.; Zhang, Y.; Chen, L.; Dong, F., *Sensors and Actuators B: Chemical* **2015**, *212*, 273-277.
- [87] Ding, B.; Kim, J.; Miyazaki, Y.; Shiratori, S., *Sensors and Actuators B: Chemical* **2004**, *101*, 373-380.
- [88] Wang, X.; Cui, F.; Lin, J.; Ding, B.; Yu, J.; Al-Deyab, S. S., *Sensors and Actuators B: Chemical* **2012**, *171-172*, 658-665.
- [89] Jia, Y.; Chen, L.; Yu, H.; Zhang, Y.; Dong, F., *RSC Advances* **2015**, *5*, 40620-40627.
- [90] Viter, R.; Chaaya, A. A.; Iatsunskyi, I.; Nowaczyk, G.; Kovalevskis, K.; Erts, D.; Miele, P.; Smyntyna, V.; Bechelany, M., *Nanotechnology* **2015**, *26*, 105501.
- [91] Luoh, R.; Hahn, H. T., *Composites Science and Technology* **2006**, *66*, 2436-2441.
- [92] Long, Y.; Chen, H.; Wang, H.; Peng, Z.; Yang, Y.; Zhang, G.; Li, N.; Liu, F.; Pei, J., *Analytica chimica acta* **2012**, *744*, 82-91.
- [93] Long, Y.; Chen, H.; Yang, Y.; Wang, H.; Yang, Y.; Li, N.; Li, K.; Pei, J.; Liu, F., *Macromolecules* **2009**, *42*, 6501-6509.
- [94] Urrutia, A.; Goicoechea, J.; Rivero, P. J.; Matías, I. R.; Arregui, F. J., *Sensors and Actuators B: Chemical* **2013**, *176*, 569-576.
- [95] Xue, R.; Behera, P.; Xu, J.; Viapiano, M. S.; Lannutti, J. J., *Sensors and Actuators B: Chemical* **2014**, *192*, 697-707.
- [96] Wolf, C.; Tscherner, M.; Köstler, S., *Sensors and Actuators B: Chemical* **2015**, *209*, 1064-1069.
- [97] Wolf, C.; Tscherner, M.; Köstler, S.; Ribitsch, V. Optochemical sensors based on polymer nanofibers with ultra-fast response characteristics. In *Proceedings of SENSORS, 2014 IEEE*, 2014; 950-953.
- [98] Lv, Y.-Y.; Wu, J.; Xu, Z.-K., *Sensors and Actuators B: Chemical* **2010**, *148*, 233-239.



- [99] Park, J.-A.; Moon, J.; Lee, S.-J.; Kim, S. H.; Zyung, T.; Chu, H. Y., *Materials Letters* **2010**, *64*, 255-257.
- [100] Park, J. A.; Moon, J.; Lee, S. J.; Kim, S. H.; Zyung, T.; Chu, H. Y., *Thin Solid Films* **2010**, *518*, 6642-6645.
- [101] Zhang, J.; Choi, S.-W.; Kim, S. S., *Journal of Solid State Chemistry* **2011**, *184*, 3008-3013.
- [102] Kim, I.-D.; Jeon, E.-K.; Choi, S.-H.; Choi, D.-K.; Tuller, H. L., *Journal of electroceramics* **2010**, *25*, 159-167.
- [103] Park, J.-A.; Moon, J.; Lee, S.-J.; Lim, S.-C.; Zyung, T., *Current Applied Physics* **2009**, *9*, S210-S212.
- [104] Wei, S.; Zhao, G.; Du, W.; Tian, Q., *Vacuum* **2016**, *124*, 32-39.
- [105] Chi, X.; Liu, C.; Liu, L.; Li, Y.; Wang, Z.; Bo, X.; Liu, L.; Su, C., *Sensors and Actuators B: Chemical* **2014**, *194*, 33-37.
- [106] Li, W. Q.; Ma, S. Y.; Luo, J.; Mao, Y. Z.; Cheng, L.; Gengzang, D. J.; Xu, X. L.; Yan, S. H., *Materials Letters* **2014**, *132*, 338-341.
- [107] Wei, S.; Zhou, M.; Du, W., *Sensors and Actuators B: Chemical* **2011**, *160*, 753-759.
- [108] Yu, X.; Song, F.; Zhai, B.; Zheng, C.; Wang, Y., *Physica E: Low-dimensional Systems and Nanostructures* **2013**, *52*, 92-96.
- [109] Liang, X.; Jin, G.; Liu, F.; Zhang, X.; An, S.; Ma, J.; Lu, G., *Ceramics International* **2015**, *41*, 13780-13787.
- [110] KARIMI, E. Z.; ESMAEILZADEH, J.; MARZBANRAD, E., *Bulletin of Materials Science* **2015**, *38*, 209-214.
- [111] Giancaterini, L.; Emamjomeh, S. M.; De Marcellis, A.; Palange, E.; Cantalini, C., *Procedia Engineering* **2015**, *120*, 791-794.
- [112] Cho, N. G.; Yang, D. J.; Jin, M.-J.; Kim, H.-G.; Tuller, H. L.; Kim, I.-D., *Sensors and Actuators B: Chemical* **2011**, *160*, 1468-1472.

- [113] Zheng, W.; Li, Z.; Zhang, H.; Wang, W.; Wang, Y.; Wang, C., *Materials Research Bulletin* **2009**, *44*, 1432-1436.
- [114] Cheng, L.; Ma, S. Y.; Wang, T. T.; Li, X. B.; Luo, J.; Li, W. Q.; Mao, Y. Z.; Gz, D. J., *Materials Letters* **2014**, *131*, 23-26.
- [115] Zheng, W.; Lu, X.; Wang, W.; Li, Z.; Zhang, H.; Wang, Y.; Wang, Z.; Wang, C., *Sensors and Actuators B: Chemical* **2009**, *142*, 61-65.
- [116] Liu, Y.; Gao, C.; Pan, X.; An, X.; Xie, Y.; Zhou, M.; Song, J.; Zhang, H.; Liu, Z.; Zhao, Q.; Zhang, Y.; Xie, E., *Applied Surface Science* **2011**, *257*, 2264-2268.
- [117] Katoch, A.; Choi, S.-W.; Kim, H. W.; Kim, S. S., *Journal of Hazardous Materials* **2015**, *286*, 229-235.
- [118] Cui, J.; Shi, L.; Xie, T.; Wang, D.; Lin, Y., *Sensors and Actuators B: Chemical* **2016**, *227*, 220-226.
- [119] Li, Z.; Fan, Y.; Zhan, J., *European Journal of Inorganic Chemistry* **2010**, 3348-3353.
- [120] Chi, X.; Liu, C.; Zhang, J.; Liu, L.; Li, H.; He, Y.; Bo, X.; Liu, L., *Journal of Semiconductors* **2014**, *35*, 064005.
- [121] Cheng, L.; Ma, S. Y.; Li, X. B.; Luo, J.; Li, W. Q.; Li, F. M.; Mao, Y. Z.; Wang, T. T.; Li, Y. F., *Sensors and Actuators B: Chemical* **2014**, *200*, 181-190.
- [122] Cheng, J. P.; Wang, B. B.; Zhao, M. G.; Liu, F.; Zhang, X. B., *Sensors and Actuators B: Chemical* **2014**, *190*, 78-85.
- [123] Tang, W.; Wang, J.; Qiao, Q.; Liu, Z.; Li, X., *Journal of Materials Science* **2015**, *50*, 2605-2615.
- [124] Xu, X.; Chen, Y.; Zhang, G.; Ma, S.; Lu, Y.; Bian, H.; Chen, Q., *Journal of Alloys and Compounds* **2017**, *703*, 572-579.
- [125] Shan, H.; Liu, C.; Liu, L.; Li, S.; Wang, L.; Zhang, X.; Bo, X.; Chi, X., *Sensors and Actuators B: Chemical* **2013**, *184*, 243-247.
- [126] Su, C.; Zou, Y.; Xu, X.; Liu, L.; Liu, Z.; Liu, L., *Colloids and Surfaces A: Physicochemical and Engineering Aspects* **2015**, *472*, 63-68.

- [127] Su, C.; Liu, C.; Liu, L.; Ni, M.; Li, H.; Bo, X.; Liu, L.; Chi, X., *Applied Surface Science* **2014**, *314*, 931-935.
- [128] Liu, C.; Shan, H.; Liu, L.; Li, S.; Li, H., *Ceramics International* **2014**, *40*, 2395-2399.
- [129] Zhao, C.; Bai, J.; Huang, B.; Wang, Y.; Zhou, J.; Xie, E., *Sensors and Actuators B: Chemical* **2016**, *231*, 552-560.
- [130] Wan, G. X.; Ma, S. Y.; Li, X. B.; Li, F. M.; Bian, H. Q.; Zhang, L. P.; Li, W. Q., *Materials Letters* **2014**, *114*, 103-106.
- [131] Li, W.; Ma, S.; Yang, G.; Mao, Y.; Luo, J.; Cheng, L.; Gengzang, D.; Xu, X.; Yan, S., *Materials Letters* **2015**, *138*, 188-191.
- [132] Sun, Y.; Zhao, Z.; Li, P.; Li, G.; Chen, Y.; Zhang, W.; Hu, J., *Applied Surface Science* **2015**, *356*, 73-80.
- [133] Liu, L.; Li, S.; Zhuang, J.; Wang, L.; Zhang, J.; Li, H.; Liu, Z.; Han, Y.; Jiang, X.; Zhang, P., *Sensors and Actuators B: Chemical* **2011**, *155*, 782-788.
- [134] Xu, X. L.; Chen, Y.; Ma, S. Y.; Li, W. Q.; Mao, Y. Z., *Sensors and Actuators B: Chemical* **2015**, *213*, 222-233.
- [135] Feng, C.; Wang, C.; Cheng, P.; Li, X.; Wang, B.; Guan, Y.; Ma, J.; Zhang, H.; Sun, Y.; Sun, P.; Zheng, J.; Lu, G., *Sensors and Actuators B: Chemical* **2015**, *221*, 434-442.
- [136] Bai, X.; Ji, H.; Gao, P.; Zhang, Y.; Sun, X., *Sensors and Actuators B: Chemical* **2014**, *193*, 100-106.
- [137] Choi, S.-J.; Lee, I.; Jang, B.-H.; Youn, D.-Y.; Ryu, W.-H.; Park, C. O.; Kim, I.-D., *Analytical chemistry* **2013**, *85*, 1792-1796.
- [138] Lian, H.; Wang, G.; Yue, H.; Liu, L.; Guo, X.; Wang, X., *Micro and Nano Letters* **2016**, *11*, 825-827.
- [139] Liu, L.; Zhang, T.; Wang, L.; Li, S., *Materials Letters* **2009**, *63*, 2041-2043.
- [140] Li, W. Q.; Ma, S. Y.; Li, Y. F.; Li, X. B.; Wang, C. Y.; Yang, X. H.; Cheng, L.; Mao, Y. Z.; Luo, J.; Gengzang, D. J.; Wan, G. X.; Xu, X. L., *Journal of Alloys and Compounds* **2014**, *605*, 80-88.

- [141] Guo, L.; Xie, N.; Wang, C.; Kou, X.; Ding, M.; Zhang, H.; Sun, Y.; Song, H.; Wang, Y.; Lu, G., *Sensors and Actuators B: Chemical* **2018**, *255*, 1015-1023.
- [142] Jiang, Z.; Jiang, T.; Wang, J.; Wang, Z.; Xu, X.; Wang, Z.; Zhao, R.; Li, Z.; Wang, C., *Journal of Colloid and Interface Science* **2015**, *437*, 252-258.
- [143] Wang, T. T.; Ma, S. Y.; Cheng, L.; Luo, J.; Jiang, X. H.; Jin, W. X., *Sensors and Actuators B: Chemical* **2015**, *216*, 212-220.
- [144] Mohanapriya, P.; Segawa, H.; Watanabe, K.; Watanabe, K.; Samitsu, S.; Natarajan, T. S.; Jaya, N. V.; Ohashi, N., *Sensors and Actuators B: Chemical* **2013**, *188*, 872-878.
- [145] Wang, Z.; Liu, L., *Materials Letters* **2009**, *63*, 917-919.
- [146] Kou, X.; Wang, C.; Ding, M.; Feng, C.; Li, X.; Ma, J.; Zhang, H.; Sun, Y.; Lu, G., *Sensors and Actuators, B: Chemical* **2016**, *236*, 425-432.
- [147] Li, Z.; Dzenis, Y., *Talanta* **2011**, *85*, 82-85.
- [148] Liu, L.; Zhang, T.; Li, S.; Wang, L.; Tian, Y., *Materials Letters* **2009**, *63*, 1975-1977.
- [149] Liu, L.; Guo, C.; Li, S.; Wang, L.; Dong, Q.; Li, W., *Sensors and Actuators B: Chemical* **2010**, *150*, 806-810.
- [150] Dong, K.-Y.; Choi, J.-K.; Hwang, I.-S.; Lee, J.-W.; Kang, B. H.; Ham, D.-J.; Lee, J.-H.; Ju, B.-K., *Sensors and Actuators B: Chemical* **2011**, *157*, 154-161.
- [151] Lian, H.; Feng, Y.; Wang, Z.; Liu, L.; Guo, X.; Wang, X., *Applied Physics A: Materials Science and Processing* **2017**, *123*, 123:158.
- [152] Chen, D. D.; Li, Z.; Jin, X.; Yi, J. X., *Chin. J. Chem. Phys.* **2017**, *30*, 474-478.
- [153] Cho, N. G.; Woo, H.-S.; Lee, J.-H.; Kim, I.-D., *Chemical Communications* **2011**, *47*, 11300-11302.
- [154] Ma, L.; Ma, S. Y.; Kang, H.; Shen, X. F.; Wang, T. T.; Jiang, X. H.; Chen, Q., *Materials Letters* **2017**, *209*, 188-192.
- [155] Zhao, M.; Wang, X.; Ning, L.; Jia, J.; Li, X.; Cao, L., *Sensors and Actuators B: Chemical* **2011**, *156*, 588-592.

- [156] Liu, J.; Guo, W.; Qu, F.; Feng, C.; Li, C.; Zhu, L.; Zhou, J.; Ruan, S.; Chen, W., *Ceramics International* **2014**, *40*, 6685-6689.
- [157] Yang, J.; Gao, C.; Yang, H.; Wang, X.; Jia, J., *Eur. Phys. J. Appl. Phys.* **2017**, *79*, 30101.
- [158] Kim, N.-H.; Choi, S.-J.; Yang, D.-J.; Bae, J.; Park, J.; Kim, I.-D., *Sensors and Actuators B: Chemical* **2014**, *193*, 574-581.
- [159] Ma, S.; Jia, J.; Tian, Y.; Cao, L.; Shi, S.; Li, X.; Wang, X., *Ceramics International* **2016**, *42*, 2041-2044.
- [160] Lin, Y.; Wei, W.; Li, Y.; Li, F.; Zhou, J.; Sun, D.; Chen, Y.; Ruan, S., *Journal of Alloys and Compounds* **2015**, *651*, 690-698.
- [161] Wang, X.; Zhang, J.; Wang, L.; Li, S.; Liu, L.; Su, C.; Liu, L., *Journal of Materials Science & Technology* **2015**, *31*, 1175-1180.
- [162] Wang, X.; Li, H.; Ni, M.; Wang, L.; Liu, L.; Wang, H.; Guo, X., *Journal of Electronic Materials* **2017**, *46*, 363-369.
- [163] Wang, X.; Zhang, J.; He, Y.; Wang, L.; Liu, L.; Wang, H.; Guo, X.; Lian, H., *Chemical Physics Letters* **2016**, *658*, 319-323.
- [164] Liu, C.; Wang, X.; Xie, F.; Liu, L.; Ruan, S., *Journal of Materials Science: Materials in Electronics* **2016**, *27*, 9870-9876.
- [165] Wang, J.; Zou, B.; Ruan, S.; Zhao, J.; Chen, Q.; Wu, F., *Materials Letters* **2009**, *63*, 1750-1753.
- [166] He, Y.; Wang, D.; Ge, F.; Liu, L., *Journal of Semiconductors* **2015**, *36*, 083005.
- [167] Feng, C.; Li, X.; Wang, C.; Sun, Y.; Zheng, J.; Lu, G., *RSC Advances* **2014**, *4*, 47549-47555.
- [168] Kim, J. H.; Zheng, Y.; Mirzaei, A.; Kim, S. S., *Korean Journal of Materials Research* **2016**, *26*, 741-750.
- [169] Katoch, A.; Byun, J.-H.; Choi, S.-W.; Kim, S. S., *Sensors and Actuators B: Chemical* **2014**, *202*, 38-45.

- [170] Feng, C.; Wang, C.; Zhang, H.; Li, X.; Wang, C.; Cheng, P.; Ma, J.; Sun, P.; Gao, Y.; Zhang, H.; Sun, Y.; Zheng, J.; Lu, G., *Sensors and Actuators B: Chemical* **2015**, *221*, 1475-1482.
- [171] Moon, J.; Park, J.-A.; Lee, S.-J.; Zyung, T.; Kim, I.-D., *Sensors and Actuators B: Chemical* **2010**, *149*, 301-305.
- [172] Kim, J. H.; Abideen, Z. U.; Zheng, Y.; Kim, S. S., *Sensors* **2016**, *16*, 1857.
- [173] Yang, X.; Salles, V.; Kaneti, Y. V.; Liu, M.; Maillard, M.; Journet, C.; Jiang, X.; Brioude, A., *Sensors and Actuators B: Chemical* **2015**, *220*, 1112-1119.
- [174] Wang, Y.; Zhang, H.; Sun, X., *Applied Surface Science* **2016**, *389*, 514-520.
- [175] Liu, Y.; Yang, P.; Li, J.; Matras-Postolek, K.; Yue, Y.; Huang, B., *RSC Advances* **2016**, *6*, 13371-13376.
- [176] Yan, S. H.; Ma, S. Y.; Li, W. Q.; Xu, X. L.; Cheng, L.; Song, H. S.; Liang, X. Y., *Sens Actuators, B Chem* **2015**, *221*, 88-95.
- [177] Liu, Y.; Yang, P.; Li, J.; Matras-Postolek, K.; Yue, Y.; Huang, B., *RSC Advances* **2015**, *5*, 98500-98507.
- [178] Li, W.; Ma, S.; Li, Y.; Yang, G.; Mao, Y.; Luo, J.; Gengzang, D.; Xu, X.; Yan, S., *Sens Actuators, B Chem* **2015**, *211*, 392-402.
- [179] Yan, S.; Wu, Q., *Sens Actuators, B Chem* **2014**, *205*, 329-337.
- [180] Wang, B. B.; Fu, X. X.; Liu, F.; Shi, S. L.; Cheng, J. P.; Zhang, X. B., *Journal of Alloys and Compounds* **2014**, *587*, 82-89.
- [181] Khorami, H. A.; Keyanpour-Rad, M.; Vaezi, M. R., *Applied Surface Science* **2011**, *257*, 7988-7992.
- [182] Yan, C.; Lu, H.; Gao, J.; Zhu, G.; Yin, F.; Yang, Z.; Liu, Q.; Li, G., *Journal of Alloys and Compounds* **2017**, *699*, 567-574.
- [183] Li, F.; Gao, X.; Wang, R.; Zhang, T.; Lu, G., *Sensors and Actuators, B: Chemical* **2016**, 812-819.

- [184] Yan, S. H.; Ma, S. Y.; Xu, X. L.; Li, W. Q.; Luo, J.; Jin, W. X.; Wang, T. T.; Jiang, X. H.; Lu, Y.; Song, H. S., *Materials Letters* **2015**, *159*, 447-450.
- [185] Li, X.; Zhang, H.; Feng, C.; Sun, Y.; Ma, J.; Wang, C.; Lu, G., *RSC Advances* **2014**, *4*, 27552-27555.
- [186] Chi, X.; Liu, C.; Li, Y.; Li, H.; Liu, L.; Bo, X.; Liu, L.; Su, C., *Materials Science in Semiconductor Processing* **2014**, *27*, 494-499.
- [187] Liu, L.; Li, S.; Guo, X.; He, Y.; Wang, L., *Journal of Semiconductors* **2016**, *37*, 013005.
- [188] Yu, Q.; Zhu, J.; Xu, Z.; Huang, X., *Sensors and Actuators B: Chemical* **2015**, *213*, 27-34.
- [189] Du, H.; Wang, J.; Su, M.; Yao, P.; Zheng, Y.; Yu, N., *Sensors and Actuators B: Chemical* **2012**, *166-167*, 746-752.
- [190] Choi, S.-W.; Katoch, A.; Sun, G.-J.; Kim, S. S., *Sensors and Actuators B: Chemical* **2013**, *181*, 787-794.
- [191] Park, J.-A.; Moon, J.; Lee, S.-J.; Kim, S. H.; Chu, H. Y.; Zyung, T., *Sensors and Actuators B: Chemical* **2010**, *145*, 592-595.
- [192] Wei, S.; Zhang, Y.; Zhou, M., *Solid State Communications* **2011**, *151*, 895-899.
- [193] Liu, L.; Zhang, Y.; Wang, G.; Li, S.; Wang, L.; Han, Y.; Jiang, X.; Wei, A., *Sensors and Actuators B: Chemical* **2011**, *160*, 448-454.
- [194] Song, X.; Zhang, D.; Fan, M., *Applied Surface Science* **2009**, *255*, 7343-7347.
- [195] Li, C.; Feng, C.; Qu, F.; Liu, J.; Zhu, L.; Lin, Y.; Wang, Y.; Li, F.; Zhou, J.; Ruan, S., *Sensors and Actuators B: Chemical* **2015**, *207, Part A*, 90-96.
- [196] Zheng, W.; Lu, X.; Wang, W.; Dong, B.; Zhang, H.; Wang, Z.; Xu, X.; Wang, C., *Journal of the American Ceramic Society* **2010**, *93*, 15-17.
- [197] Tang, W.; Wang, J.; Yao, P.; Li, X., *Sensors and Actuators B: Chemical* **2014**, *192*, 543-549.

[198] Zhao, Y.; He, X.; Li, J.; Gao, X.; Jia, J., *Sensors and Actuators B: Chemical* **2012**, *165*, 82-87.

[199] Katoch, A.; Choi, S.-W.; Kim, J.-H.; Lee, J. H.; Lee, J.-S.; Kim, S. S., *Sensors and Actuators B: Chemical* **2015**, *214*, 111-116.

[200] Bai, S.; Guo, W.; Sun, J.; Li, J.; Tian, Y.; Chen, A.; Luo, R.; Li, D., *Sensors and Actuators B: Chemical* **2016**, *226*, 96-103.

[201] Alali, K. T.; Liu, T.; Liu, J.; Liu, Q.; Fertassi, M. A.; Li, Z.; Wang, J., *Journal of Alloys and Compounds* **2017**, *702*, 20-30.
